# Supplementary material for: Exercise-therapy and education for individuals one year after anterior cruciate ligament reconstruction: a pilot randomised controlled trial
Source: Springer Nature journal article supplement (doi:10.1186/s12891-020-03919-6), 2021-01-11
Supplement: MOESM2 [file 18758292]

# PROJECT DETAILS

*An exploration of the feasibility of a randomised clinical trial for physiotherapy intervention in patients at high risk of early-onset knee osteoarthritis and symptomatic decline following anterior cruciate ligament reconstruction.*

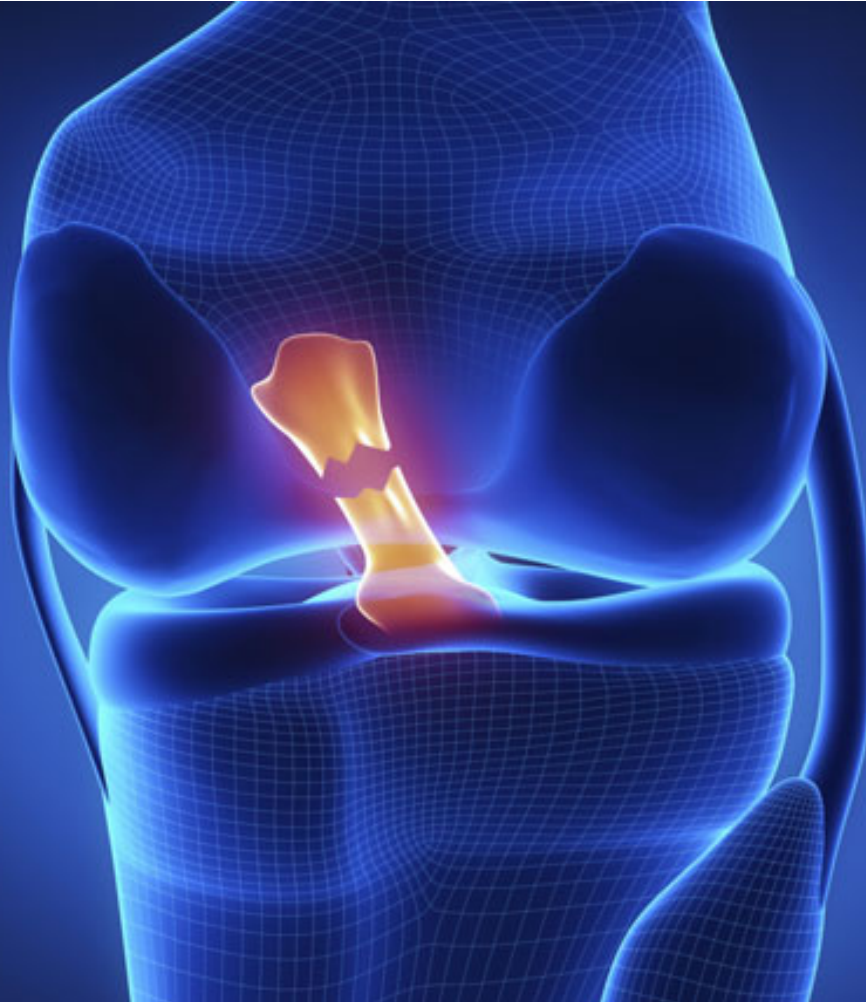

**Investigators:** Ms Brooke Patterson, Professor Kay Crossley, Dr Adam Culvenor, and Dr Christian Barton.

If you have any questions relating to the project please contact Chief Investigator – Professor Kay Crossley.

This project is approved by the La Trobe Human Ethics Committee (HEC-16-077)

Please remember – investigator Brooke Patterson is blinded to patient group

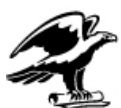

**LA TROBE**  
UNIVERSITY

Sport and Exercise Medicine  
Research Centre

# INTRODUCTION

This exercise-therapy and education protocol is a guide for treating physiotherapists in a pilot randomised controlled trial who are treating individuals who have undergone ACL reconstruction 12-15 months prior and have been identified at risk of early osteoarthritis progression and symptomatic decline. The guide contains both our intervention (lower-limb focussed) and control (trunk-focussed) protocols.

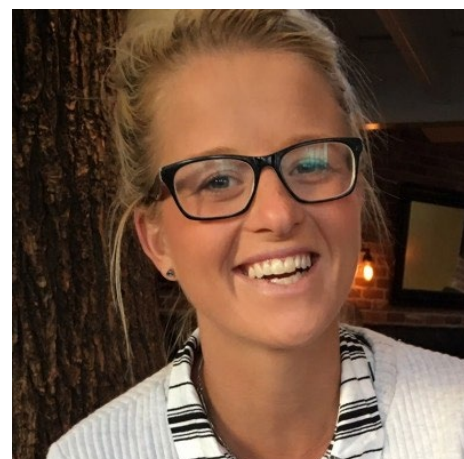

The lower-limb focussed program (*note patient-facing name: "Kangaroo"*) is based on the best available evidence and by a group of experienced clinician researchers in the ACL and musculoskeletal field. People following ACLR continue to have persistent lower limb neuromuscular deficits, do not return to sport, and have reduced quality of life. Rehabilitation requires great commitment from the patient and the therapist, and there are multiple areas to work on and monitor.

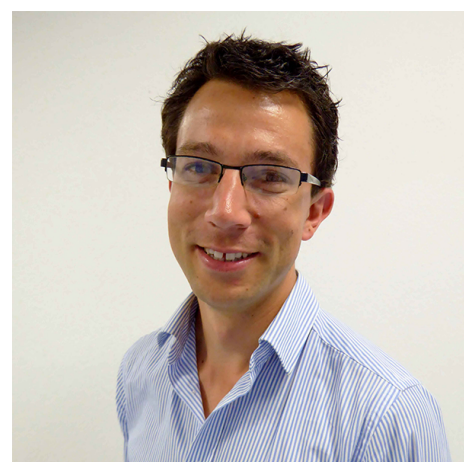

Every patient is different and the purpose of this guide is not to produce a recipe, as it allows for varying levels of ability and goals. We have chosen key areas or “tasks” that we believe are most important to recovery in this population, with each task having multiple phases to allow for individualisation.

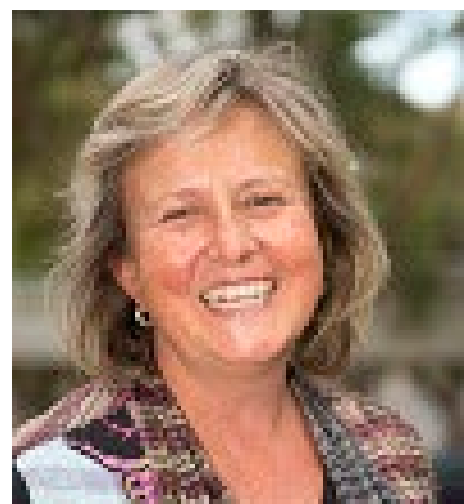

This exercise therapy and education protocol for the trunk-focussed group (*note patient facing name: "Devil"*) is outlined on Page 17-19

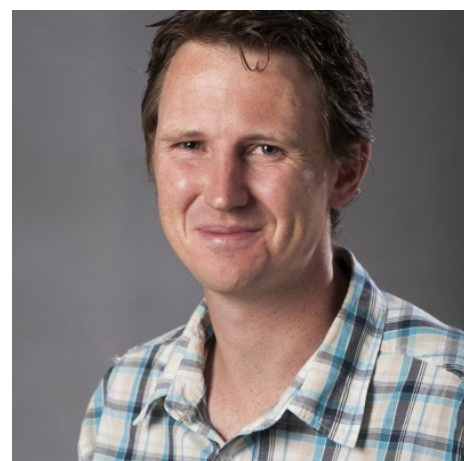

Brooke Patterson      Dr Adam Culvenor

Professor Kay Crossley      Dr Christian Barton

La Trobe University Sports and Exercise Medicine Centre  
For further information and many more sports medicine  
related topics visit: <http://semrc.blogs.latrobe.edu.au>

**PHYSIOTHERAPY PROGRAM:  
TASK PROJECT  
(Group: Kangaroo) Participant ID:**

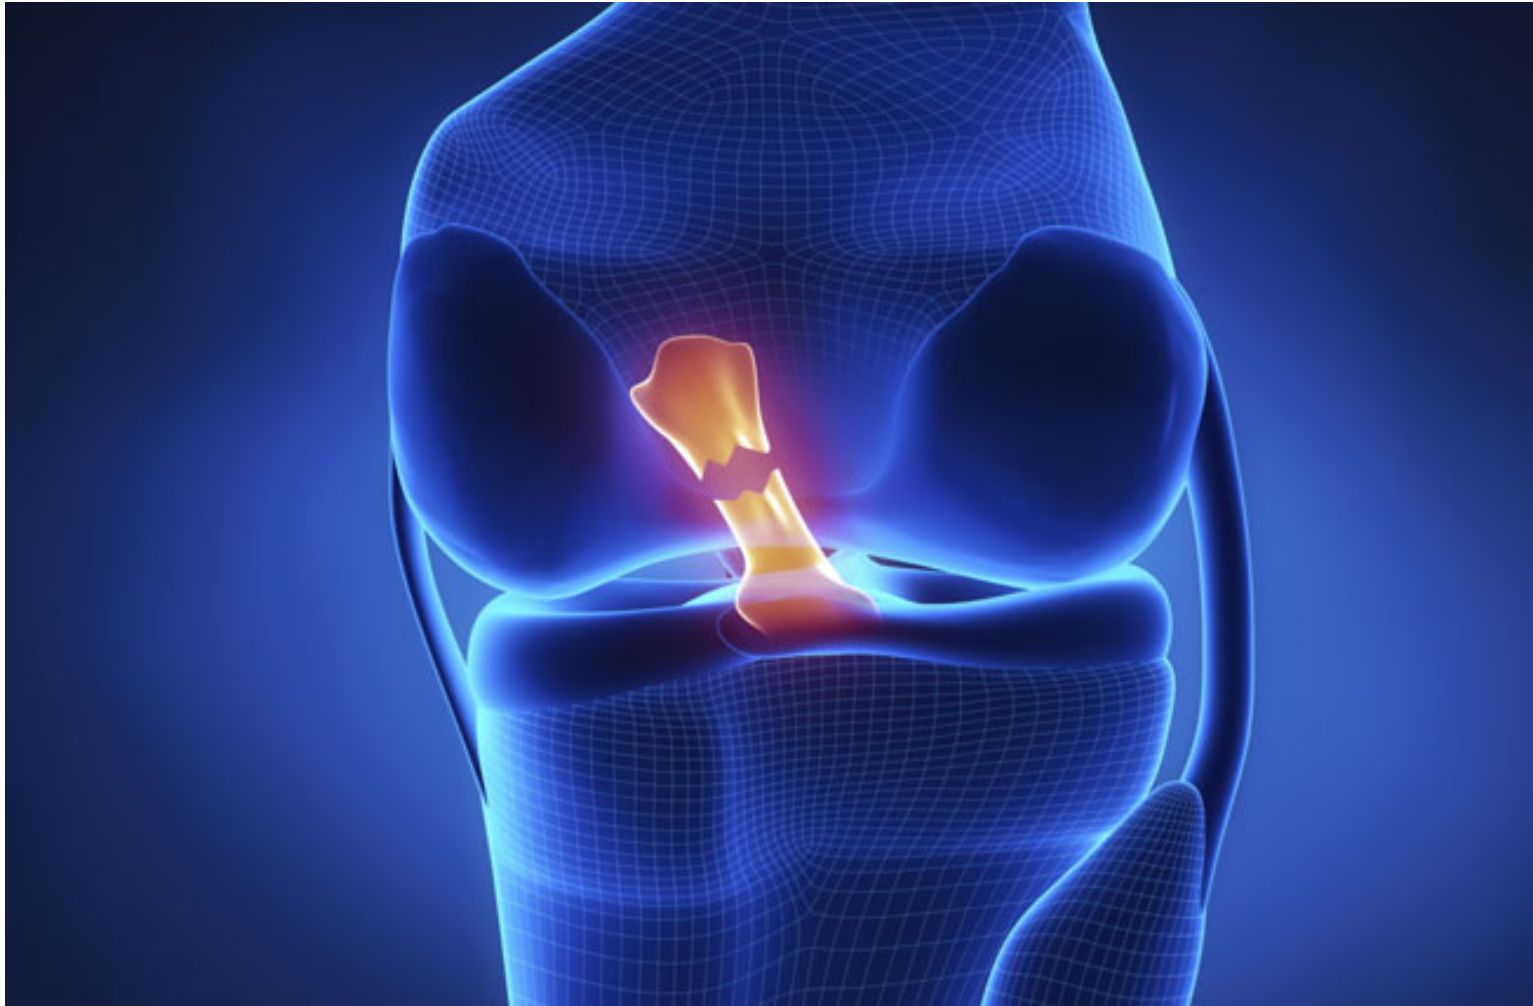

**This booklet contains:**

- Exercise protocol and progressions
- Physiotherapist clinical notes and attendance record
- Educational resources and handouts
- **Other resources you may need:**
- Administrative procedures physiotherapy handbook

# OVERVIEW OF PROGRAM (lower-limb focussed ntervention)

## 1. General

This exercise therapy and education program is designed for every patient to progress at his or her own pace and ability. Patients are to attend 8 face-to-face physiotherapy sessions of 30 minutes duration. Therapists are to use the treatment sessions to progress through each "task" (target area) individually ensuring that the patient is challenged and working towards a strength and/or power dosage as recommended by resistance training principles.

## 2. Exercise therapy protocol

These "tasks" comprise of various muscle groups and movements that must be targeted after ACL reconstruction. Each task has at least 3 phases of difficulty, and guides for progression criteria. Patients can be on different phases of difficulty for different tasks. I.e. Phase 1 of balance, and Phase 3 of calf.

**TASK 1: Movement rretraining (walk – run – jump- land – cut)**

**TASK 2: Squat**

**TASK 3: Balance**

**TASK 4: Hip stabilisers**

**TASK 5: Calf**

**TASK 6: Trunk**

**TASK 7: Hip extensors**

**TASK 8: Cardiovascular/sport**

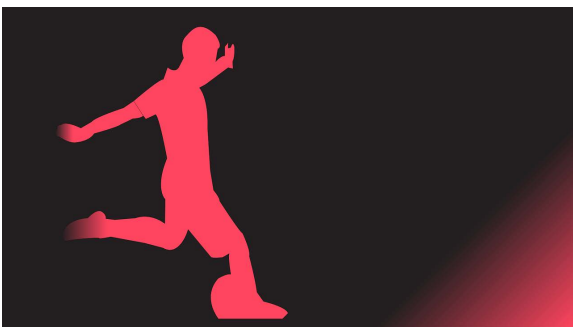

It may not be appropriate for patients to be completing exercises in all tasks - use clinical reasoning to prescribe exercises based on the patient's needs, goals and level of adherence.

## 3. Independent Exercise Program

Encourage patients to complete the exercise-therapy program a minimum 3x week. Use clinical reasoning if appropriate to prescribe more or less and combine with sporting activities.

# OVERVIEW OF PROGRAM

## 4. Manual therapy

If appropriate you may perform manual therapy if impairments such as pain, swelling, range of motion or joint mobility is affecting the patient's ability to perform the exercises. Please follow the treatment algorithm on Page 14.

**Mobility and stretching** exercises may be appropriate if you deem range of motion or muscle length is affecting the patient's ability to perform an exercise (i.e. hip flexor/quadriceps length affecting bridge)

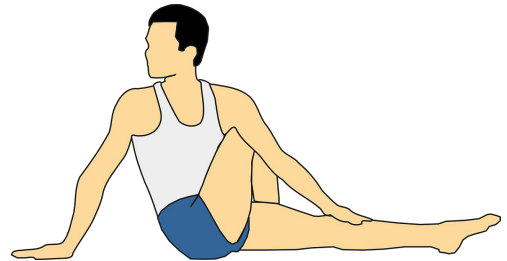

## 5 Education

It is important to educate the patients on the level of commitment required to benefit from a resistance training program, achieve adequate physical and psychological criteria to return to sport, and independently manage their knee joint health in the long term. Remind patients of the following expectations, and provide them with the handouts (Page 20 to 34) as you deem appropriate.

### **Time:**

Exercises at least 3 x week.

Dependent on the level of recovery, ability, and goals of the individual.

### **Equipment:**

When they will need to access the gym.

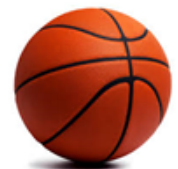

### **Return to sport:**

Does the patient want to get back to previous level of activity? When?

Based on achievement of specific goals (strength, level of functioning), not time.

Clinicians should follow the guide for return to running and return to sport outlined on Page 35-36. Each of the outcome measures related to the criteria are outlined on Page 37-44.

**Provide patients with the leaflets on Page to 20-34 and provide face-to-face education as appropriate.**

## TASK 1: MOVEMENT RETRAINING

### Physiotherapy Log

| TASK 1: MOVEMENT RETRAINING |                                                                                                      |                                                                                                                                    |                                                                                                                                                                                                                     |                                                                                     | Physiotherapy Log                                                                  |
|-----------------------------|------------------------------------------------------------------------------------------------------|------------------------------------------------------------------------------------------------------------------------------------|---------------------------------------------------------------------------------------------------------------------------------------------------------------------------------------------------------------------|-------------------------------------------------------------------------------------|------------------------------------------------------------------------------------|
| Straight Line               |                                                                                                      | Landing                                                                                                                            | Lateral                                                                                                                                                                                                             | Multidirectional                                                                    |                                                                                    |
| <b>Phase 1</b>              | “Walking drills”<br>Normal gait                                                                      | “Landing technique”<br>Walk through and teach key points                                                                           | “Lateral movement technique”<br>Walk through and teach key points                                                                                                                                                   | See Video: Cutting technique<br>Walk through and teach key points                   | Session ( ): Date:<br>Phase + Dosage:                                              |
| <b>Dosage*</b>              | Complete 10 minutes of 1:1 movement technique with physio<br>At home: 10 sets of 5 (rest 30s), daily |                                                                                                                                    |                                                                                                                                                                                                                     |                                                                                     |                                                                                    |
| <b>Phase 2</b>              | “Running program”<br>(see Task 8)                                                                    | “Jump series”<br>(Increase height/length) with:<br>- On spot<br>- Forwards<br>- On to step<br>- Off step (progress to with a jump) | “Lateral movement technique”<br>Progress through the following<br>- Step lateral, shift weight and touch cone<br>- Moving sidesteps – without resistance, with theraband, increase speed<br>- Bounding side to side | “Agility Program”<br><br>45 – 90 – 135 – 180 degree cuts                            | Session ( ): Date:<br>Phase + Dosage:<br><br>Session ( ): Date:<br>Phase + Dosage: |
| <b>Dosage*</b>              | As per Task 8 graduated                                                                              | 5 sets of 5 reps max effort BW (rest 60s) max effort. 3 x week                                                                     |                                                                                                                                                                                                                     | As per program on Task 8 graduated                                                  | Session ( ): Date:<br>Phase + Dosage:                                              |
| <b>Phase 3</b>              | Sprinting program<br>(see Task 8)<br><br>“Running program”<br>PHYSITRACK                             | “Hop series”<br>- as per jump series above                                                                                         | “Side jump series”<br>- Increase speed/decrease contact time<br>- Over hurdles/step                                                                                                                                 | Multidirectional and unanticipated<br>– Including individual & partner skill drills | Session ( ): Date:<br>Phase + Dosage:                                              |
| <b>Dosage*</b>              | As per Task 8 graduated                                                                              | 5 sets of 5 reps max effort BW (rest 60s. 3 x week)                                                                                |                                                                                                                                                                                                                     | As per program on Task 8 graduated                                                  | Session ( ): Date:<br>Phase + Dosage:                                              |
| <b>Phase 4</b>              | Acceleration/<br>Deceleration/<br>program (see Task 8)<br><br>“Running program”<br>PHYSITRACK        | Any advanced landing specific to sport and integrate sport specific skills                                                         | “Side hop series”<br>- Increase speed / decrease contact time<br>- Over hurdles/step                                                                                                                                | Integrate into non contact training drills                                          | Session ( ): Date:<br>Phase + Dosage:<br><br>Session ( ): Date:<br>Phase + Dosage: |
| <b>Dosage*</b>              | As per Task 8 graduated                                                                              | 5 sets of 5 reps max effort BW (rest 60s) 3 x week                                                                                 |                                                                                                                                                                                                                     | As per program on Task 8 graduated                                                  | Session ( ): Date:<br>Phase + Dosage:                                              |

\*Pass once completed set dosage + correct technique/functional alignment/area of fatigue, nil response of pain (<2/10) or swelling.

| TASK 2: SQUATS       |                                                                                                                                                                                                                                                                                              | Physiotherapy Log                     |
|----------------------|----------------------------------------------------------------------------------------------------------------------------------------------------------------------------------------------------------------------------------------------------------------------------------------------|---------------------------------------|
| Phase 1              | Wall Sit                                                                                                                                                                                                                                                                                     | Session ( ): Date:<br>Phase + Dosage: |
|                      | Progress:<br>- Depth 30 - 90 degrees**                                                                                                                                                                                                                                                       |                                       |
| Dosage               | 3 sets of 60s isometric (rest 60s) BW. 3 x week                                                                                                                                                                                                                                              | Session ( ): Date:<br>Phase + Dosage: |
| Progress to Phase 2* | Able to DL BW Squat x 15 <2/10 pain<br>OR Wall Sit to 90 degrees                                                                                                                                                                                                                             |                                       |
| Phase 2              | Squatting Series**                                                                                                                                                                                                                                                                           | Session ( ): Date:<br>Phase + Dosage: |
|                      | Double leg Options<br>- "Squat"<br>- "Squat" – dumbbells<br>"Squat" – barbell back squat                                                                                                                                                                                                     |                                       |
|                      | Single Leg Options<br>- "Single Leg Rise" assisted<br>- "Single Leg Rise" unassisted<br>- "Single Leg Rise" with external load (5 - 15kg)<br>- "Single leg squat" +/- load                                                                                                                   | Session ( ): Date:<br>Phase + Dosage: |
| Dosage<br>3 x week   | 3 x 10-12 reps (3s down, 0 hold, 2s up) (60s rest)<br>Fatigue at 12 reps<br>Can be doing DL and SL exercise coinciding<br>3 x week : Double leg<br>3 x week: Single leg                                                                                                                      | Session ( ): Date:<br>Phase + Dosage: |
| Progress to Phase 3* | Able to squat DL Body Weight external load                                                                                                                                                                                                                                                   |                                       |
| Phase 3              | Squatting Series (Power)**                                                                                                                                                                                                                                                                   | Session ( ): Date:<br>Phase + Dosage: |
|                      | As above different dosage<br>Advanced – jump / hop with smith machine bar / load                                                                                                                                                                                                             |                                       |
| Dosage<br>3 x week   | 5-10 repetitions, 3-5 sets (2s down, 0 hold, 1s up)<br>(60-90s rest) Progress load as appropriate<br><br>Note: Patient can be doing DL and SL strengthening at the same time. For example, Phase 2 (double or single) exercise in the same session or 2 x week Phase 2, and 1 x week Phase 3 | Session ( ): Date:<br>Phase + Dosage: |

\*Pass once completed set dosage + correct technique/functional alignment/area of fatigue, nil response of pain (<2/10) or swelling.

\*\*Depth as appropriate for patient (their anatomy/ROM, goals, pathology)

| <b>TASK 3: BALANCE</b> |                                                                                                                                                                                                                                                                                         | Description of Exercise                                                                                                                                                                           | Physiotherapy Log                     |
|------------------------|-----------------------------------------------------------------------------------------------------------------------------------------------------------------------------------------------------------------------------------------------------------------------------------------|---------------------------------------------------------------------------------------------------------------------------------------------------------------------------------------------------|---------------------------------------|
| <b>Phase 1</b>         | “SLS” (Eyes Open -> Eyes Closed)                                                                                                                                                                                                                                                        | Focus on early awareness of: <ul style="list-style-type: none"> <li>- Foot control</li> <li>- Gluteal activation and pelvic position</li> <li>- Alignment of shoulder, hip, knee, foot</li> </ul> | Session ( ): Date:<br>Phase + Dosage: |
| <b>Dosage</b>          | 3 x 30s hold each side (0s rest). Daily <sup>#</sup>                                                                                                                                                                                                                                    |                                                                                                                                                                                                   |                                       |
| Progress to Phase 2*   | 15s eyes closed each side good control, no loss of balance                                                                                                                                                                                                                              |                                                                                                                                                                                                   |                                       |
| <b>Phase 2</b>         | “SLS Bosu” (Eyes Open -> Closed)<br>Bosu ball/foam/Pillow at home                                                                                                                                                                                                                       |                                                                                                                                                                                                   |                                       |
| <b>Dosage</b>          | 3 x 30s hold each side (0s rest). Daily <sup>#</sup>                                                                                                                                                                                                                                    |                                                                                                                                                                                                   |                                       |
| Progress to Phase 3*   | 15s eyes closed each leg good control, no loss of balance                                                                                                                                                                                                                               | Session ( ): Date:<br>Phase + Dosage:                                                                                                                                                             |                                       |
| <b>Phase 3</b>         | “Balance and reach” <ul style="list-style-type: none"> <li>- Hand to cones /throwing task</li> <li>- Toe to cones</li> <li>- Progress distance appropriate to patient size</li> <li>- Progress to foam</li> </ul>                                                                       |                                                                                                                                                                                                   |                                       |
| <b>Dosage</b>          | 3 x 10 touches each side (2s down 2s up) (0s rest). Minimum 3 x week                                                                                                                                                                                                                    |                                                                                                                                                                                                   |                                       |
| Progress to Phase 4*   | 10 each side with good control, no loss of balance                                                                                                                                                                                                                                      |                                                                                                                                                                                                   |                                       |
| <b>Phase 4</b>         | “Advanced Balance series 1 or 2” (can vary it) <ol style="list-style-type: none"> <li>Various balancing on ½ foam roller / beam</li> <li>+/- Skills</li> <li>Up to discretion of physio – make sport specific</li> </ol> Alternatives on Physitrack – “curtsy slide’ “Jump on off bosu” |                                                                                                                                                                                                   |                                       |
| <b>Dosage</b>          | 3 x 60s duration (60s rest). Minimum 3 x week                                                                                                                                                                                                                                           |                                                                                                               | Session ( ): Date:<br>Phase + Dosage: |
| Ongoing progression *  | Continue to challenge patient as appropriate or specific to their sport.                                                                                                                                                                                                                |                                                                                                                                                                                                   |                                       |
|                        |                                                                                                                                                                                                                                                                                         |                                                                                                                                                                                                   |                                       |

\*Pass once completed set dosage + correct technique/functional alignment/area of fatigue, nil response of pain (<2/10) or swelling.

<sup>#</sup>In Physitrack “add exercise” go to appropriate balance exercise and click add to specific “off” days – usually 2,4,6,7.



| TASK 4: Hip          |                                                                                                                                                                                               | Description of Exercise                                                                                                                                                | Physiotherapy Log                                |                                                                                                 |
|----------------------|-----------------------------------------------------------------------------------------------------------------------------------------------------------------------------------------------|------------------------------------------------------------------------------------------------------------------------------------------------------------------------|--------------------------------------------------|-------------------------------------------------------------------------------------------------|
| Phase 1              | Side-lying hip abduction                                                                                                                                                                      | <p><i>Emphasise posterior pelvic tilt</i></p> <p><i>“Heel behind hip”/don’t let leg drift forward</i></p> <p><i>trunk position/don’t let back push into ground</i></p> | <p>Session ( ): Date:</p> <p>Phase + Dosage:</p> |                                                                                                 |
|                      | Progress:<br>- Theraband resistance (Yellow – Green – Blue) and length                                                                                                                        |                                                                                                                                                                        |                                                  |                                                                                                 |
| Dosage               | <p>3 x 10-12 (3s up, 1s hold, 3s down) each side to 45 degrees (swap 0s rest)</p> <p>Load: BW or theraband to fatigue at 12 reps/12RM</p> <p>If BW - 5 x week</p> <p>Theraband – 3 x week</p> |                                                                                                                                                                        |                                                  | <p>Session ( ): Date:</p> <p>Phase + Dosage:</p>                                                |
| Progress to Phase 2* | 3 x 10-12 blue theraband (15cm length when tied) to 30 degrees                                                                                                                                |                                                                                                                                                                        |                                                  | <p>Session ( ): Date:</p> <p>Phase + Dosage:</p>                                                |
| Phase 2              | Standing Hip Abduction Resisted                                                                                                                                                               | <p><i>Light upper limb support allowed</i></p>                                      | <p>Session ( ): Date:</p> <p>Phase + Dosage:</p> |                                                                                                 |
|                      | Progress:<br>- Theraband resistance (Yellow – Green – Blue) and length                                                                                                                        |                                                                                                                                                                        |                                                  |                                                                                                 |
| Dosage               | <p>3 x 10-12 (3s out, 1s hold, 3s in) each side to 30 degrees (swap 0s rest)</p> <p>Load: BW or theraband to fatigue at 12 reps/12RM</p> <p>3 x week</p>                                      |                                                                                                                                                                        |                                                  | <p>Session ( ): Date:</p> <p>Phase + Dosage:</p>                                                |
| Progress to Phase 3* | 3 x 10-2 blue theraband (15cm length when tied) to 30 degrees                                                                                                                                 |                                                                                                                                                                        |                                                  | <p>Session ( ): Date:</p> <p>Phase + Dosage:</p>                                                |
| Phase 3              | Standing Hip Abduction Cables                                                                                                                                                                 | <p>Alternatively gold/silver theraband can provide sufficient resistance</p>       | <p>Session ( ): Date:</p> <p>Phase + Dosage:</p> |                                                                                                 |
|                      | Progress:<br>- External load                                                                                                                                                                  |                                                                                                                                                                        |                                                  |                                                                                                 |
| Dosage<br>3 x week   | <p>3 x 8-10 (3s up, 1s hold, 3s down) each side to 30 degrees (swap 0s rest)</p> <p>Load: BW or theraband to fatigue at 10 reps/10RM</p>                                                      |                                                                                                                                                                        |                                                  | <p>Session ( ): Date:</p> <p>Phase + Dosage:</p>                                                |
|                      |                                                                                                                                                                                               |                                                                                                                                                                        |                                                  | <p><i>Light upper limb support allowed</i></p> <p>Session ( ): Date:</p> <p>Phase + Dosage:</p> |

\*\*Pass once completed set dosage + correct technique/functional alignment/area of fatigue, nil response of pain (<2/10) or swelling.

\*\*If struggling with activation, give as 7x week activation work (i.e. pillow between legs). Adjust accordingly in Physitrack  
7x week for this exercise

| TASK 5: Calf              |                                                                                                     | Description of Exercise                                                                                                                                                                                                      | Physiotherapy Log                                                                           |
|---------------------------|-----------------------------------------------------------------------------------------------------|------------------------------------------------------------------------------------------------------------------------------------------------------------------------------------------------------------------------------|---------------------------------------------------------------------------------------------|
| <b>Phase 1</b>            | “Calf Raise” Bilat - BW Double Leg<br>“Soleus Raise” – BW Double Leg                                | <p><i>Emphasise medial calf /foot intrinsic/Pushing through big toe</i></p> <p><i>Focus on technique, foot control</i></p> <p><i>Note focus on patient deficits and bias knee extended vs knee flexed as appropriate</i></p> | <p>Session ( ): Date:<br/>Phase + Dosage:</p> <p>Session ( ): Date:<br/>Phase + Dosage:</p> |
| <b>Dosage</b>             | 3 x 30 (2s up 1s hold 2s down) (Rest 30s) Full available ROM                                        |                                                                                                                                                                                                                              |                                                                                             |
|                           | 5 x week<br>3 sessions: KE<br>2 sessions: KF (or vice versa depending on patient)                   |                                                                                                                                                                                                                              |                                                                                             |
| Progress to Phase 2*      | 3 x 20 body weight correct fatigue area and form                                                    |                                                                                                                                            | <p>Session ( ): Date:<br/>Phase + Dosage:</p> <p>Session ( ): Date:<br/>Phase + Dosage:</p> |
| <b>Phase 2</b>            | “SL Calf Raise” - Body Weight<br>“SL Soleus Raise” – Body Weight                                    |                                                                                                                                                                                                                              |                                                                                             |
| <b>Dosage</b>             | 3 x 15 - 30 (2s up 1s hold 2s down) (Rest 30s) Full available ROM                                   |                                                                                                                                                                                                                              |                                                                                             |
|                           | 3 x week /every 2nd day<br>2 sessions: KE<br>1 sessions: KF (or vice versa depending on patient)    |                                                                                                                                          | <p>Session ( ): Date:<br/>Phase + Dosage:</p> <p>Session ( ): Date:<br/>Phase + Dosage:</p> |
| Progress to Phase 3*      | 1. 3 x 25 BW<br>2. >95% LSI (max reps compared side to side)                                        |                                                                                                                                                                                                                              |                                                                                             |
| <b>Phase 3</b>            | “SL Calf Raise - off Step” (Body Weight)<br>“SL Soleus Raise - off Step” (Body Weight)              |                                                                                                                                                                                                                              |                                                                                             |
| <b>Dosage</b><br>3 x week | 3 x 10-12 (2s up 1s hold 2s down) (Rest 30s)                                                        |                                                                                                                                          | <p>Session ( ): Date:<br/>Phase + Dosage:</p> <p>Session ( ): Date:<br/>Phase + Dosage:</p> |
|                           | 3 x week/every 2nd day<br>2 sessions: KE<br>1 sessions: KF (or vice versa depending on patient)     |                                                                                                                                                                                                                              |                                                                                             |
| Progress to Phase 4*      | 1. 3 x 25 BW<br>2. >95% LSI (max reps compared side to side)                                        |                                                                                                                                                                                                                              |                                                                                             |
| <b>Phase 4</b>            | “SL Calf Raise off Step” with external load<br>“SL Soleus Raise off Step” with external load        | <p>Note: option for Smith Machine Seated for soleus</p>                                                                                                                                                                      | <p>Session ( ): Date:<br/>Phase + Dosage:</p>                                               |
| <b>Dosage</b>             | 3 x 12 (2s up, 1s hold, 2s down) (Rest 30s) Full available ROM                                      |                                                                                                                                                                                                                              |                                                                                             |
|                           | 3 x week /every second day<br>2 sessions: KE<br>1 sessions: KF (or vice versa depending on patient) |                                                                                                                                                                                                                              |                                                                                             |
| Ongoing progressions      | Continue to build load to maintain dosage 3 8-12RM                                                  |                                                                                                                                          | <p>Session ( ): Date:<br/>Phase + Dosage:</p>                                               |
|                           |                                                                                                     |                                                                                                                                                                                                                              |                                                                                             |
|                           |                                                                                                     |                                                                                                                                                                                                                              |                                                                                             |

\*Pass once completed set dosage + correct technique/functional alignment/area of fatigue, nil response of pain (<2/10) or swelling.

| TASK 6: TRUNK <sup>^</sup> |                                                                                                                                                                      | Physiotherapy Log                     |
|----------------------------|----------------------------------------------------------------------------------------------------------------------------------------------------------------------|---------------------------------------|
| Phase 1                    | Bench Plank – 45 degrees – 30 degrees                                                                                                                                | Session ( ): Date:<br>Phase + Dosage: |
|                            | Progress:<br>- Height of bench (45 – 30 – 15 degrees) to elbows on ground (0 degrees body angle)                                                                     |                                       |
| Dosage                     | 3 x 60s isometric hold (60s rest)<br>3 x week/every 2 <sup>nd</sup> day                                                                                              | Session ( ): Date:<br>Phase + Dosage: |
| Progress to Phase 2*       | 60s elbows on ground /0 degrees body angle with good trunk control                                                                                                   |                                       |
| Phase 2                    | “Elbow Plank”                                                                                                                                                        | Session ( ): Date:<br>Phase + Dosage: |
|                            | Progress:<br>- Push Up Plank<br>- Push Up Plank with hip knee drive (+/-)theraband                                                                                   |                                       |
| Dosage                     | 3 x 60s isometric hold (60s rest)<br>3 x week/every 2 <sup>nd</sup> day<br>Knee drive – 3 x 10 reps each side (2s out 2s in)                                         | Session ( ): Date:<br>Phase + Dosage: |
| Progress to Phase 2*       | 60s on knee drive with theraband                                                                                                                                     |                                       |
| Phase 3                    | “Side plank series” (start on knees)                                                                                                                                 | Session ( ): Date:<br>Phase + Dosage: |
|                            | Progress:<br>- On toes and elbow<br>- On toes and hand                                                                                                               |                                       |
| Dosage                     | 3 x 60s isometric hold (60s rest)<br>3 x week/every 2 <sup>nd</sup> day                                                                                              | Session ( ): Date:<br>Phase + Dosage: |
| Progress to Phase 2*       | 60s on toes with arm and leg raise                                                                                                                                   |                                       |
| Phase 4                    | Rotational trunk series<br>- Palov press or rotations with theraband or cable<br>- Side plank with rotation with weight<br>Other Physitrack options – cable woodchop | Session ( ): Date:<br>Phase + Dosage: |
|                            | Dosage                                                                                                                                                               |                                       |
| Ongoing Progressions*      | Continue to challenge patient as appropriate or specific to their sport.                                                                                             | Session ( ): Date:<br>Phase + Dosage: |

\*\*Pass once completed set dosage + correct technique/functional alignment/area of fatigue, nil response of pain (<2/10) or swelling.

Key points as per video:

- Keep pelvis tucked/squeeze gluts
- Sink shoulder blades
- Neck neutral
- Reinforce into functional movements and activities

| TASK 7: Gluteal/Hamstring |                                                                                          | Physiotherapy Log                     |
|---------------------------|------------------------------------------------------------------------------------------|---------------------------------------|
| <b>Phase 1</b>            | Double Leg Bridge                                                                        | Session (_): Date:<br>Phase + Dosage: |
| <b>Dosage</b>             | Activation: 3 x 15 reps (2s up, 2s down) + 20s hold (30s rest)<br>7 x week <sup>#</sup>  |                                       |
| Progress to Phase 2*      | Feeling gluteals working for 3 x 20 DL<br>Feels gluteals > hamstring working in SL trial | Session (_): Date:<br>Phase + Dosage: |
| <b>Phase 2</b>            | Single Leg bridge                                                                        |                                       |
|                           | Progress:<br>- Assisted to unassisted                                                    |                                       |
| <b>Dosage</b>             | 3 x 15 reps (2s up, 2s hold 2s down) (60s rest)<br>3 x week/ every 2 <sup>nd</sup> day   | Session (_): Date:<br>Phase + Dosage: |
| Progress to Phase 3*      | Full height:<br>1. >95% LSI<br>2. > 15 reps max<br>3. Fatigue - mainly gluteals          |                                       |
| <b>Phase 3</b>            | Hamstring Bridge series (on bench)                                                       | Session (_): Date:<br>Phase + Dosage: |
|                           | Progress:<br>Double – single                                                             |                                       |
| <b>Dosage</b>             | 3 x 15 (2s up, 2s down) (60s rest)<br>3 x week / every 2 <sup>nd</sup> day               |                                       |
| Progress to Phase 4*      | 3 x 15 single leg                                                                        | Session (_): Date:<br>Phase + Dosage: |
| <b>Phase 4</b>            | Hamstring Ball Curl series                                                               |                                       |
|                           | Progress: Double – single<br>Combine with DL- do 3 SL and 9 DL                           |                                       |
| <b>Dosage</b>             | 3 x 12 (2s out, 0 hold 2s in) (60s rest)<br>3 x week / every 2 <sup>nd</sup> day         | Session (_): Date:<br>Phase + Dosage: |
| <b>Phase 5</b>            | Nordics<br>Progress:<br>Assisted (theraband) – unassisted                                |                                       |
| <b>Dosage</b>             | 3 x 4-6 (2s out, hold 2, 2s in)<br>3 x week / every 2 <sup>nd</sup> day                  | Session (_): Date:<br>Phase + Dosage: |
| Ongoing Progressions*     | To physio discretion according to patient needs                                          |                                       |

\*Pass once completed set dosage + correct technique/functional alignment/area of fatigue (as per video), nil response of pain (<2/10) or swelling.

<sup>#</sup>In Physitrack still delete Days 2, 4, 6, 7 still, then "Add exercise" go to exercise and click add to specific "off" days usually 2,4,6,7.

| TASK 8: Sport Specific/Cardiovascular^ |                                                                                                        | Description of Exercise                                                                                                                                                                                                                                                                                                                                                                                                                                                                                                                                                                                                                                                                                                     | Physiotherapy Log                                                                        |
|----------------------------------------|--------------------------------------------------------------------------------------------------------|-----------------------------------------------------------------------------------------------------------------------------------------------------------------------------------------------------------------------------------------------------------------------------------------------------------------------------------------------------------------------------------------------------------------------------------------------------------------------------------------------------------------------------------------------------------------------------------------------------------------------------------------------------------------------------------------------------------------------------|------------------------------------------------------------------------------------------|
| Phase 1                                | <b>Non-impact cross training</b>                                                                       | Walking<br>Bike<br>Swimming<br>Cross Trainer<br>Deep water jogging<br>Rowing<br><br>PLUS Non-impact Sport Specific Skills                                                                                                                                                                                                                                                                                                                                                                                                                                                                                                                                                                                                   | Session ( ):<br>Date:<br>Phase + Dosage:<br><br>Session ( ):<br>Date:<br>Phase + Dosage: |
|                                        | Phase 1.1 10 mins                                                                                      |                                                                                                                                                                                                                                                                                                                                                                                                                                                                                                                                                                                                                                                                                                                             |                                                                                          |
|                                        | Phase 1.2 20 mins                                                                                      |                                                                                                                                                                                                                                                                                                                                                                                                                                                                                                                                                                                                                                                                                                                             |                                                                                          |
|                                        | Phase 1.3 30 mins                                                                                      |                                                                                                                                                                                                                                                                                                                                                                                                                                                                                                                                                                                                                                                                                                                             |                                                                                          |
|                                        | Phase 1.4 30 mins (inc 5x60s high intensity, 90s rest)                                                 |                                                                                                                                                                                                                                                                                                                                                                                                                                                                                                                                                                                                                                                                                                                             |                                                                                          |
|                                        | Phase 1.5 30 mins (inc 5x2mins high intensity, 120s rest)                                              |                                                                                                                                                                                                                                                                                                                                                                                                                                                                                                                                                                                                                                                                                                                             |                                                                                          |
|                                        | Phase 1.6 45 mins with 15 mins high intensity                                                          |                                                                                                                                                                                                                                                                                                                                                                                                                                                                                                                                                                                                                                                                                                                             |                                                                                          |
| Progress to Phase 2*                   | Return to Running Outcome Measures (See section 4.6)                                                   |                                                                                                                                                                                                                                                                                                                                                                                                                                                                                                                                                                                                                                                                                                                             |                                                                                          |
| Phase 2*                               | <b>Running + Agility Program</b>                                                                       | Note: distance/time can be catered to individual needs/sport<br>At least one rest day between sessions<br><br><b>Running progressions:</b><br>1. Walk: jog (5:1, 4:2, 3:3, 2:4, 1:5)<br>2. Continuous<br><br><b>High intensity progressions</b><br>Total time (10-20 minutes) can be made up of:<br>1. Straight line efforts<br>2. Straight line acceleration/deceleration<br>3. Agility program (example attached)                                                                                                                                                                                                                                                                                                         | Session ( ):<br>Date:<br>Phase + Dosage:<br><br>Session ( ):<br>Date:<br>Phase + Dosage: |
|                                        | Phase 2.1 Run 15 minutes + 30 mins Phase 1                                                             |                                                                                                                                                                                                                                                                                                                                                                                                                                                                                                                                                                                                                                                                                                                             |                                                                                          |
|                                        | Phase 2.2 Run 20 minutes + 25 mins Phase 1                                                             |                                                                                                                                                                                                                                                                                                                                                                                                                                                                                                                                                                                                                                                                                                                             |                                                                                          |
|                                        | Phase 2.3 Run 30 minutes + 20 mins Phase 1                                                             |                                                                                                                                                                                                                                                                                                                                                                                                                                                                                                                                                                                                                                                                                                                             |                                                                                          |
|                                        | Phase 2.4 Run 45 minutes inc 10 mins high intensity/agility                                            |                                                                                                                                                                                                                                                                                                                                                                                                                                                                                                                                                                                                                                                                                                                             |                                                                                          |
|                                        | Phase 2.5 Run 50 minutes inc 20 mins high intensity/agility                                            |                                                                                                                                                                                                                                                                                                                                                                                                                                                                                                                                                                                                                                                                                                                             |                                                                                          |
| Progress to Phase 3*                   | >90% Return to Sport Score                                                                             |                                                                                                                                                                                                                                                                                                                                                                                                                                                                                                                                                                                                                                                                                                                             |                                                                                          |
| Phase 3                                | <b>Non-Contact Training</b>                                                                            | <i>Straight line efforts</i><br>Moderate speed i.e. 14 – 16km/hr or 75%<br>High speed i.e. 16 – 20km/hr or 80-90%<br>Sprint i.e. 20-23km/hr or 100%<br><br>Progress through levels Once completed 2 sessions at 100%move to next level. (120s rest btw sets)<br><br>Level 1: 2 x 200m on 90 secs, Repeat x 2 sets<br>Level 2: 3 x 200m on 90 secs, Repeat x 2 sets<br>Level 3: 3 x 200m, on 90 secs, Repeat x 3 sets<br><br><i>Acceleration/Deceleration:</i><br>As above with 2 x 40m spurts of 100% (accel at cone, decel at cone)<br><br><input type="checkbox"/> <input type="checkbox"/> 40m 100% <input type="checkbox"/> <input type="checkbox"/> 40m 100% <input type="checkbox"/> <input type="checkbox"/><br>200m | Session ( ):<br>Date:<br>Phase + Dosage:<br><br>Session ( ):<br>Date:<br>Phase + Dosage: |
|                                        | Phase 3.1 Sport 15 minutes + 30 mins Phase 2 running                                                   |                                                                                                                                                                                                                                                                                                                                                                                                                                                                                                                                                                                                                                                                                                                             |                                                                                          |
|                                        | Phase 3.2 Sport 20 minutes + 25 mins Phase 2 running                                                   |                                                                                                                                                                                                                                                                                                                                                                                                                                                                                                                                                                                                                                                                                                                             |                                                                                          |
|                                        | Phase 3.3 Sport 30 minutes + 20 mins Phase 2 running                                                   |                                                                                                                                                                                                                                                                                                                                                                                                                                                                                                                                                                                                                                                                                                                             |                                                                                          |
|                                        | Phase 3.4 Sport 45 minutes including 15 mins high intensity running /agility                           |                                                                                                                                                                                                                                                                                                                                                                                                                                                                                                                                                                                                                                                                                                                             |                                                                                          |
|                                        | Phase 3.5 Sport 50 minutes including 20 mins high intensity running + 10 minutes low intensity running |                                                                                                                                                                                                                                                                                                                                                                                                                                                                                                                                                                                                                                                                                                                             |                                                                                          |
| Progress to Phase 4*                   | >95% RETURN TO SPORT SCORE                                                                             |                                                                                                                                                                                                                                                                                                                                                                                                                                                                                                                                                                                                                                                                                                                             |                                                                                          |
| Phase 4                                | <b>Full training</b>                                                                                   | Level 4: Complete Level 3, then 2 x 200m on 90secs with accel/decel, x 2 sets<br>Level 5: Complete Level 3, then 3 x 300m, on 90secs with accel/decel, x 2 sets<br>Level 6: Complete Level 3, then 3 x 300m, on 90secs with accel/decel, x 3 sets<br>Level 7: Complete as above, but with backpedal x 2 (3 <sup>rd</sup> cone to 2 <sup>nd</sup> cone, then 5 <sup>th</sup> to 4 <sup>th</sup> )<br>(120s rest btw sets)                                                                                                                                                                                                                                                                                                    | Session ( ):<br>Date:<br>Phase + Dosage:                                                 |
|                                        | Full training up to 1 hour 3 x week (no match play)                                                    |                                                                                                                                                                                                                                                                                                                                                                                                                                                                                                                                                                                                                                                                                                                             |                                                                                          |
|                                        | Full training up to 1.5 hour 3 x week (no match play)                                                  |                                                                                                                                                                                                                                                                                                                                                                                                                                                                                                                                                                                                                                                                                                                             |                                                                                          |
|                                        | Full training including match play up to 4 x week                                                      |                                                                                                                                                                                                                                                                                                                                                                                                                                                                                                                                                                                                                                                                                                                             |                                                                                          |
| Progress to Phase 5*                   | Dosage, nil adverse effects                                                                            |                                                                                                                                                                                                                                                                                                                                                                                                                                                                                                                                                                                                                                                                                                                             |                                                                                          |
| Phase 5                                | <b>Return to match play</b>                                                                            | <b>Agility</b> - See attached section: Note must have completed straight-line accel/decel Level 4 before can start 70% agility runs.                                                                                                                                                                                                                                                                                                                                                                                                                                                                                                                                                                                        | Session ( ):<br>Date:<br>Phase + Dosage:                                                 |
|                                        | Match play 45-60 minutes x 1 week                                                                      |                                                                                                                                                                                                                                                                                                                                                                                                                                                                                                                                                                                                                                                                                                                             |                                                                                          |
|                                        | Full match load 60 minutes + 1 x week                                                                  |                                                                                                                                                                                                                                                                                                                                                                                                                                                                                                                                                                                                                                                                                                                             |                                                                                          |
|                                        | Monitor for adverse effects                                                                            |                                                                                                                                                                                                                                                                                                                                                                                                                                                                                                                                                                                                                                                                                                                             |                                                                                          |

\*Pass once completed set dosage + correct technique/functional alignment/area of fatigue, nil response of pain (<2/10) or swelling.

**ON PHYSITRACK – add the type of CVS exercise i.e. bike or running then add manually what running etc they are doing**

## TREATMENT GUIDE FOR TIER 1 – PASSIVE THERAPY

| Target for treatment                                        | Technique                                                                                                                                                                           | Aim                                                                                                                                                                                    | Description                                                                                                                                   | Dosage                                                                                    | Home Exercises                                                                                                                                                                                                          | Timeline |
|-------------------------------------------------------------|-------------------------------------------------------------------------------------------------------------------------------------------------------------------------------------|----------------------------------------------------------------------------------------------------------------------------------------------------------------------------------------|-----------------------------------------------------------------------------------------------------------------------------------------------|-------------------------------------------------------------------------------------------|-------------------------------------------------------------------------------------------------------------------------------------------------------------------------------------------------------------------------|----------|
| Overactive secondary stabilisers                            | Soft tissue massage and trigger point release of pes anserine group, adductor group, vastus lateralis, rectus femoris, popliteus, gastrocnemius group, hamstring group, gluteal/ITB | Address soft tissue restrictions with the aim of:<br>Reducing pain<br>Increasing knee joint range of movement<br>Improving muscle activation<br>Improving symptoms during function     | Sustained digital pressure to each trigger point with the muscle positioned on stretch<br>OR<br>Massage longitudinally along the muscle belly | 30-60 seconds digital pressure per trigger point<br><br>2-5 minutes of massage per muscle | Self release/trigger point/stretching of appropriate muscle group<br>Foam Roller – 2 x 10 each muscle group. 2-3 x daily<br>Spikey Ball- 3 x 30s each point. 2-3 x daily<br>Stretching – 3 x 30s each group 2-3 x daily |          |
| Swelling/Effusion                                           | Patient education                                                                                                                                                                   | Determine aggravating factors<br>Educate about management of aggravating and addressing contributing factors                                                                           | Education: Swelling vs joint effusion, inflammatory factors and cartilage<br>Contributing factors to joint load                               | NA                                                                                        | Reducing aggravating factors to allow joint to settle<br>Address contributing factors (range, strength, biomechanics)                                                                                                   |          |
| “PFJ” Anterior knee pain or stiffness felt on palpation     | PFJ mobilisation techniques<br><br>Taping techniques                                                                                                                                | Address PFJ mobility restrictions to improve knee joint range of movement, pain, muscle activation<br><br>Alleviate PFJ contact pressure with taping, reduction of aggravation factors | Lateral-medial glides, grade 111 or IV in position of restriction i.e. sidelying 30 degrees<br><br>Taping: rigid, kinesiology techniques      | 3-5 sets of 30-60 seconds                                                                 | Self mobilisation/release of appropriate soft tissue structures<br>Self taping<br>Reducing aggravating factors/addressing contributing factors as above                                                                 |          |
| ROM                                                         | Various: Inc knee extension/flexion range of motion by addressing appropriate contributing factor:                                                                                  | Bony end feel<br><br>Soft tissue soft end feel/muscle protective                                                                                                                       | Treat with respect<br><br>STW as per above OR<br>Hold relax techniques OR<br>Gr II or IV physiological mobilisation                           | NA<br><br>2-5 minutes<br>3-5 sets, 30s hold<br>3-5 sets of 30-60s                         | Range of motion exercises at discretion of physiotherapist<br>- AROM 5 daily x 20<br>- Prone Leg hang<br>Self release if muscle protective                                                                              |          |
| Muscle weakness<br>-Quad<br>- Glut<br>- Calf<br>- Hamstring | Activation techniques                                                                                                                                                               | Improve activation through hands on feedback, taping                                                                                                                                   | Therapist and patient hands on touch to muscle activation in sitting, bridging exercises<br>Kinesiology active taping                         | 2-5 minutes                                                                               | - Quads activation/STS practice 3 x 20 (DL –SL)<br>- Bridging 3 x 20 (DL-SL)<br>- Calf Raises 3 x 20 (DL-SL)<br>- SL Stance 3 x 30s (EO-EC)                                                                             |          |
| Gait                                                        | Re-education techniques                                                                                                                                                             | Determine any biomechanical deficiencies. I.e. Dec KE stance, Dec KF swing. Assess in part practice, compare to other side                                                             | Education about gait deficiencies and how leads to increased PFJ pressure and break down components<br>Video/mirror feedback/part practice    | 2-5 minutes                                                                               | Gait part practice – whole practice. I.e. stance with theraband / inner range quads control. Progress to step up. 3 x 8                                                                                                 |          |

As required/until passed Tier 1 criteria to enter Tier 2 Rehab Program. See Assessment Log Book for guidance.

## AGILITY PROGRAM – on physitrack

Distance can be varied according to individual sport/fitness level

| Drill                                                                                                                                                                                                                             | Angle Progressions                                                                                                                                                                                                                                   | Speed %<br>Max        | Dosage                                                                       |
|-----------------------------------------------------------------------------------------------------------------------------------------------------------------------------------------------------------------------------------|------------------------------------------------------------------------------------------------------------------------------------------------------------------------------------------------------------------------------------------------------|-----------------------|------------------------------------------------------------------------------|
| Phase 1<br>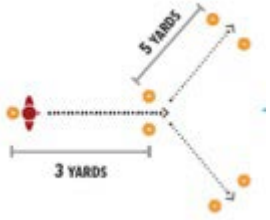                                                                                                                                      | 45 degrees                                                                                                                                                                                                                                           | 70<br>80<br>90<br>100 | 3 X 5<br>3 X 4<br>3 X 3<br>3 X 2                                             |
| Phase 2<br>                                                                                                                                      | 90 degrees                                                                                                                                                                                                                                           | 70<br>80<br>90<br>100 | 3 X 5<br>3 X 4<br>3 X 3<br>3 X 2<br><br>+/- 2 x 2 minutes<br>skipping/ladder |
| Phase 3<br>                                                                                                                                     | 135 degrees                                                                                                                                                                                                                                          | 70<br>80<br>90<br>100 | 3 X 5<br>3 X 4<br>3 X 3<br>3 X 2<br><br>+/- 2 x 2 minutes<br>skipping/ladder |
| Phase 4<br>                                                                                                                                    | 180 degrees                                                                                                                                                                                                                                          | 70<br>80<br>90<br>100 | 3 X 5<br>3 X 4<br>3 X 3<br>3 X 2<br><br>+/- 2 x 2 minutes<br>skipping/ladder |
| Phase 5<br><ul style="list-style-type: none"> <li>- Walking grapevine 20m</li> <li>- Increased speed grapevine 20m</li> <li>- "S" bends</li> <li>- Run backwards 10m, turn and go R or L (anticipated – unanticipated)</li> </ul> | Pivoting/twisting                                                                                                                                                                                                                                    | 70<br>80<br>90<br>100 | X 6                                                                          |
| Phase 6<br>Multidirectional & unanticipated<br>                                                                                                | <ul style="list-style-type: none"> <li>- Reaction ball Partner mirroring</li> <li>- Partner skill work non contact i.e. basketball defensive slides against ball carrier</li> <li>- Partner skill work contact i.e. basketball boxing out</li> </ul> | 70<br>80<br>90<br>100 | 10 - 20 minutes<br><br>Integrate into individual skill and partner drills    |

**PHYSIOTHERAPY PROGRAM:  
TASK PROJECT  
(Group: Devil) Participant ID:**

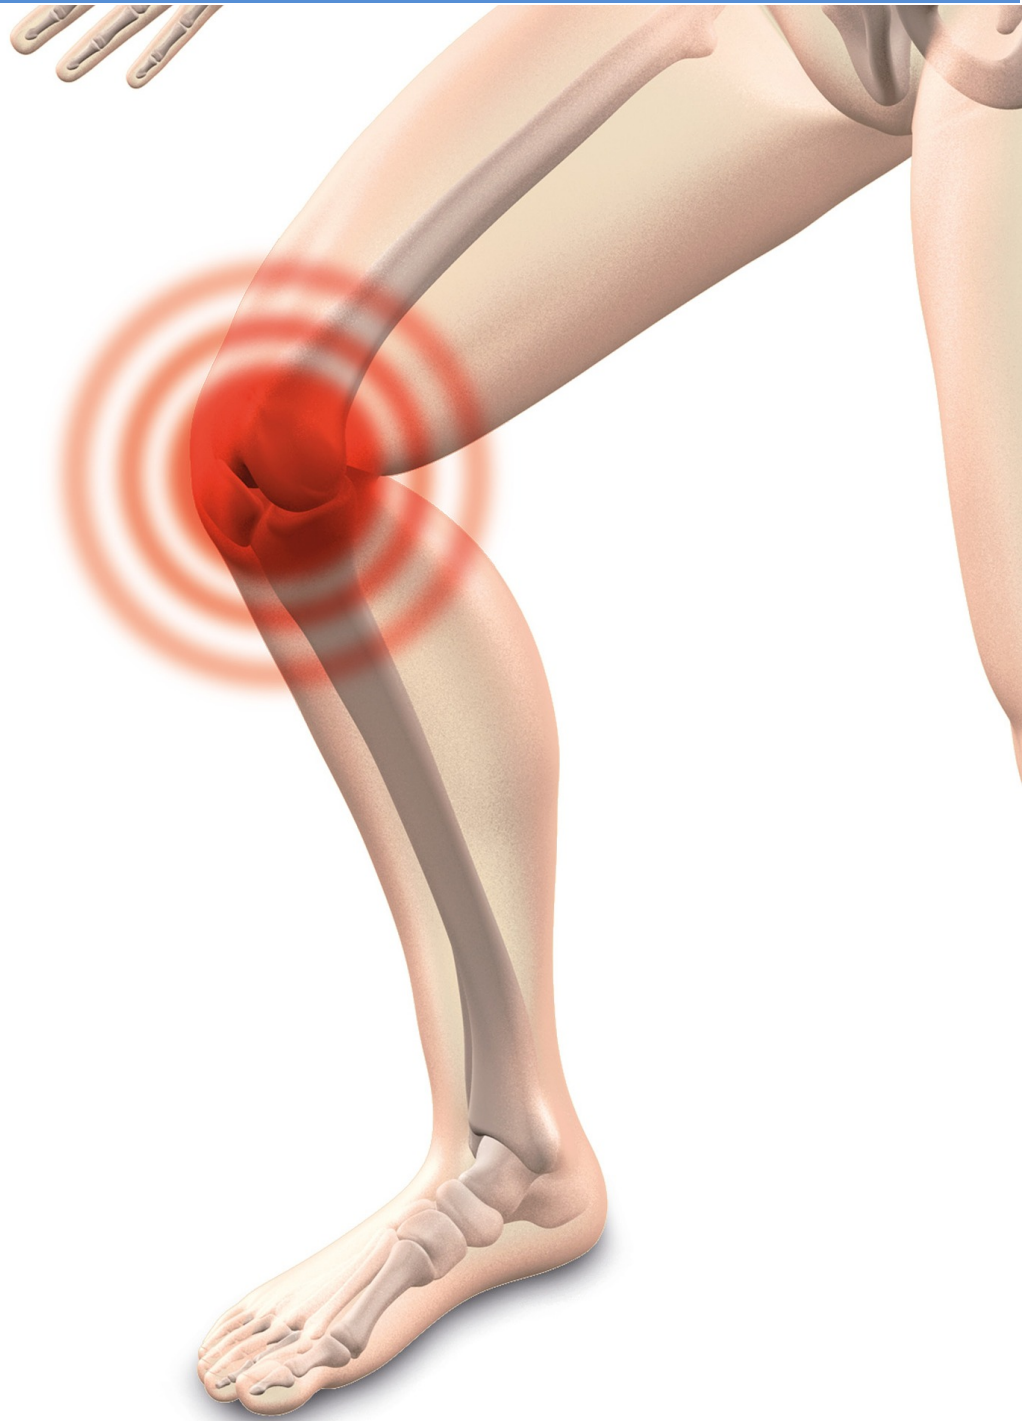

**This booklet contains:**

- Trunk strengthening exercise therapy protocol
- Physiotherapist clinical notes and attendance record
- Educational resources and handouts
- **Other resources you may need:**
- Administrative procedures physiotherapy handbook



# OVERVIEW OF PROGRAM

## General overview

The control group intervention consists of standardised trunk strengthening, stretching and education.

Patients are to attend physiotherapy appointments as per the intervention group (8 sessions of 30 minutes duration)

Whilst this is a "control group" we ask that you deliver this intervention with equal enthusiasm as the targeted ACL-specific protocol, and educate the participants on the value of trunk strength and lumbo-pelvic control for lower limb neuromuscular function, biomechanics and sport performance.

- **Trunk strengthening**
- **Stretching**
- **Education**

## 1. Exercise-therapy protocol

Choose a minimum of three trunk exercises. Progress each patient according to their level of ability through the trunk strengthening exercises. They require minimal to no equipment. (Page 16)

## 2. Stretching

Lower limb and lumbo-thoracic stretches and mobility appropriate for the patient should be prescribed (Page 17)

Participants are encouraged to perform the exercises independently 3 times per week, and record their adherence via Physiapp.

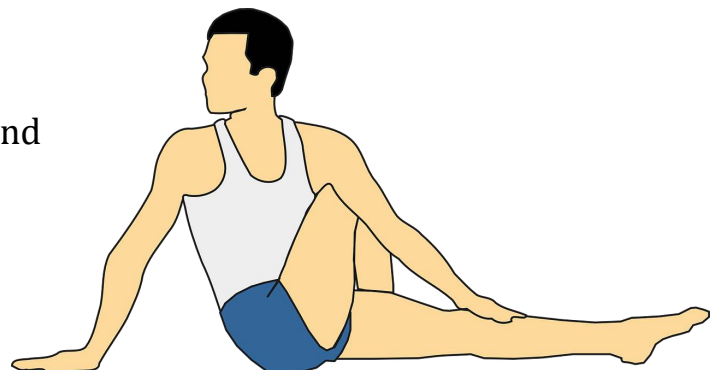

## 3. Education

Education topics for the control group are outlined on Page 20. As the control group contains only trunk strength, patients are not educated on the importance of strengthening other muscle groups and specific return to sport criteria. However, if wishing to return to sport they are encouraged to receive advice and clearance from their surgeon.

| TRUNK STRENGTH    |                                                                                                                                                                                           | Description of Exercise Program                                                                                                                                                                                                                                                                                                                                                                                                                                                                                                                                                                                                                                                                                                                | Physiotherapy Log                                                                                                                                                                                                                                                                                                                                                                  |
|-------------------|-------------------------------------------------------------------------------------------------------------------------------------------------------------------------------------------|------------------------------------------------------------------------------------------------------------------------------------------------------------------------------------------------------------------------------------------------------------------------------------------------------------------------------------------------------------------------------------------------------------------------------------------------------------------------------------------------------------------------------------------------------------------------------------------------------------------------------------------------------------------------------------------------------------------------------------------------|------------------------------------------------------------------------------------------------------------------------------------------------------------------------------------------------------------------------------------------------------------------------------------------------------------------------------------------------------------------------------------|
| <b>Exercise 1</b> | “Active alternate UL and LL extensions over ball”<br>- Or in “4 point kneeling”                                                                                                           | <p>Even though this is the control group ensure remain positive about the effectiveness of trunk strengthening, education and stretching program</p> <p>First 5 sessions use exercises 1 E 3 Big appropriate difficulty of that exercise for patient</p> <p>Make sure they get a good work out within the session – perform 3 sets of each of the 3 exercises.</p> <p>Education re trunk and pelvic position and relationship to muscle function and lower limb biomechanics</p> <p>Demonstrate pelvic position in lying and standing<br/>+ Patient practice</p> <p><b>Education re exercise program:</b></p> <ul style="list-style-type: none"> <li>- Progress as able to achieve technique and dosage</li> <li>- Minimum 3 x week</li> </ul> | <p>Session ( ): Date:<br/>Phase:<br/>Assessment:</p> |
|                   | Arm Lift – Leg Lift – Arm and Leg Lift<br><i>Alternate/fun challenge in session: Both Arms and Legs</i>                                                                                   |                                                                                                                                                                                                                                                                                                                                                                                                                                                                                                                                                                                                                                                                                                                                                |                                                                                                                                                                                                                                                                                                                                                                                    |
| <b>Dosage</b>     | 3 x 30 - 60 seconds                                                                                                                                                                       |                                                                                                                                                                                                                                                                                                                                                                                                                                                                                                                                                                                                                                                                                                                                                |                                                                                                                                                                                                                                                                                                                                                                                    |
| <b>PASS</b>       | Dosage with good control Arm & Leg Lift                                                                                                                                                   |                                                                                                                                                                                                                                                                                                                                                                                                                                                                                                                                                                                                                                                                                                                                                |                                                                                                                                                                                                                                                                                                                                                                                    |
| <b>Exercise 2</b> | “Dead bugs”<br>Toe taps – leg extension                                                                                                                                                   |                                                                                                                                                                                                                                                                                                                                                                                                                                                                                                                                                                                                                                                                                                                                                |                                                                                                                                                                                                                                                                                                                                                                                    |
|                   | <i>Alternate/fun challenge in session: ball between legs and pass to hands</i>                                                                                                            |                                                                                                                                                                                                                                                                                                                                                                                                                                                                                                                                                                                                                                                                                                                                                |                                                                                                                                                                                                                                                                                                                                                                                    |
| <b>Dosage</b>     | 3 x 30 - 60 seconds                                                                                                                                                                       |                                                                                                                                                                                                                                                                                                                                                                                                                                                                                                                                                                                                                                                                                                                                                |                                                                                                                                                                                                                                                                                                                                                                                    |
| <b>PASS</b>       | Dosage with good control on toes                                                                                                                                                          |                                                                                                                                                                                                                                                                                                                                                                                                                                                                                                                                                                                                                                                                                                                                                |                                                                                                                                                                                                                                                                                                                                                                                    |
| <b>Exercise 3</b> | Plank series <ul style="list-style-type: none"> <li>- “30 degree bench plank”</li> <li>- “Elbow plank”</li> <li>- “Plank in push up position”</li> <li>- “Plank – one arm row”</li> </ul> |                                                                                                                                                                                                                                                                                                                                                                                                                                                                                                                                                                                                                                                                                                                                                |                                                                                                                                                                                                                                                                                                                                                                                    |
|                   | <i>Alternate/fun challenge: Ball roll outs</i>                                                                                                                                            |                                                                                                                                                                                                                                                                                                                                                                                                                                                                                                                                                                                                                                                                                                                                                |                                                                                                                                                                                                                                                                                                                                                                                    |
| <b>Dosage</b>     | 3 x 30 - 60 seconds                                                                                                                                                                       |                                                                                                                                                                                                                                                                                                                                                                                                                                                                                                                                                                                                                                                                                                                                                |                                                                                                                                                                                                                                                                                                                                                                                    |
| <b>PASS</b>       | Dosage with good control                                                                                                                                                                  |                                                                                                                                                                                                                                                                                                                                                                                                                                                                                                                                                                                                                                                                                                                                                |                                                                                                                                                                                                                                                                                                                                                                                    |
| <b>Exercise 4</b> | “Anti rotation series in standing” <ul style="list-style-type: none"> <li>- Palov press</li> <li>- Rotation with theraband then cable</li> </ul>                                          |                                                                                                                                                                                                                                                                                                                                                                                                                                                                                                                                                                                                                                                                                                                                                |                                                                                                                                                                                                                                                                                                                                                                                    |
|                   | <b>Dosage</b>                                                                                                                                                                             | 3 x 30 - 60 seconds                                                                                                                                                                                                                                                                                                                                                                                                                                                                                                                                                                                                                                                                                                                            |                                                                                                                                                                                                                                                                                                                                                                                    |
| <b>PASS</b>       | Dosage with good control                                                                                                                                                                  |                                                                                                                                                                                                                                                                                                                                                                                                                                                                                                                                                                                                                                                                                                                                                |                                                                                                                                                                                                                                                                                                                                                                                    |
| <b>Exercise 5</b> | <i>Free choice trunk exercise</i>                                                                                                                                                         |                                                                                                                                                                                                                                                                                                                                                                                                                                                                                                                                                                                                                                                                                                                                                |                                                                                                                                                                                                                                                                                                                                                                                    |
|                   | According to patient needs                                                                                                                                                                |                                                                                                                                                                                                                                                                                                                                                                                                                                                                                                                                                                                                                                                                                                                                                |                                                                                                                                                                                                                                                                                                                                                                                    |
| <b>Dosage</b>     | 3 x 30 - 60 seconds                                                                                                                                                                       |                                                                                                                                                                                                                                                                                                                                                                                                                                                                                                                                                                                                                                                                                                                                                |                                                                                                                                                                                                                                                                                                                                                                                    |
| <b>PASS</b>       | Dosage with good control                                                                                                                                                                  |                                                                                                                                                                                                                                                                                                                                                                                                                                                                                                                                                                                                                                                                                                                                                |                                                                                                                                                                                                                                                                                                                                                                                    |

## Stretching and mobility

- *Education to patient - to improve joint and muscle mobility*
  - *Choose most appropriate for patient*

| Physio to circle most appropriate for individual patient | Options (type name into physitrack)                                                                                                                                                                                                                                                                                                                                     | Dosage                    | Description              |
|----------------------------------------------------------|-------------------------------------------------------------------------------------------------------------------------------------------------------------------------------------------------------------------------------------------------------------------------------------------------------------------------------------------------------------------------|---------------------------|--------------------------|
|                                                          | <ol style="list-style-type: none"><li>1. Side-lying thoracic rotations</li><li>2. Thoracic foam roll</li><li>3. Quadriceps stretch</li><li>4. Hip flexor stretch</li><li>5. Hamstring stretch</li><li>6. Gluteal myofascial release with ball</li><li>7. Rotational spine stretch</li><li>8. Calf stretching standing (gastrocs)</li><li>9. Soleus stretching</li></ol> | As appropriate to patient | See videos on Physitrack |

The following pages education leaflets are to be provided to patients in the lower-limb focussed group

- 1. What does the surgery involve?**
- 2. Rehabilitation & Return to Sport**
- 3. Can I prevent future injury?**
- 4. Psychological Impact of Injury**
- 5. Things to look out for**

The following pages education leaflets can be provided to participants in the trunk-focussed group

- 1. What does the surgery involve?**
- 4. Psychological Impact of Injury**
- 5. Things to look out for**

# 1. What does the surgery involve?

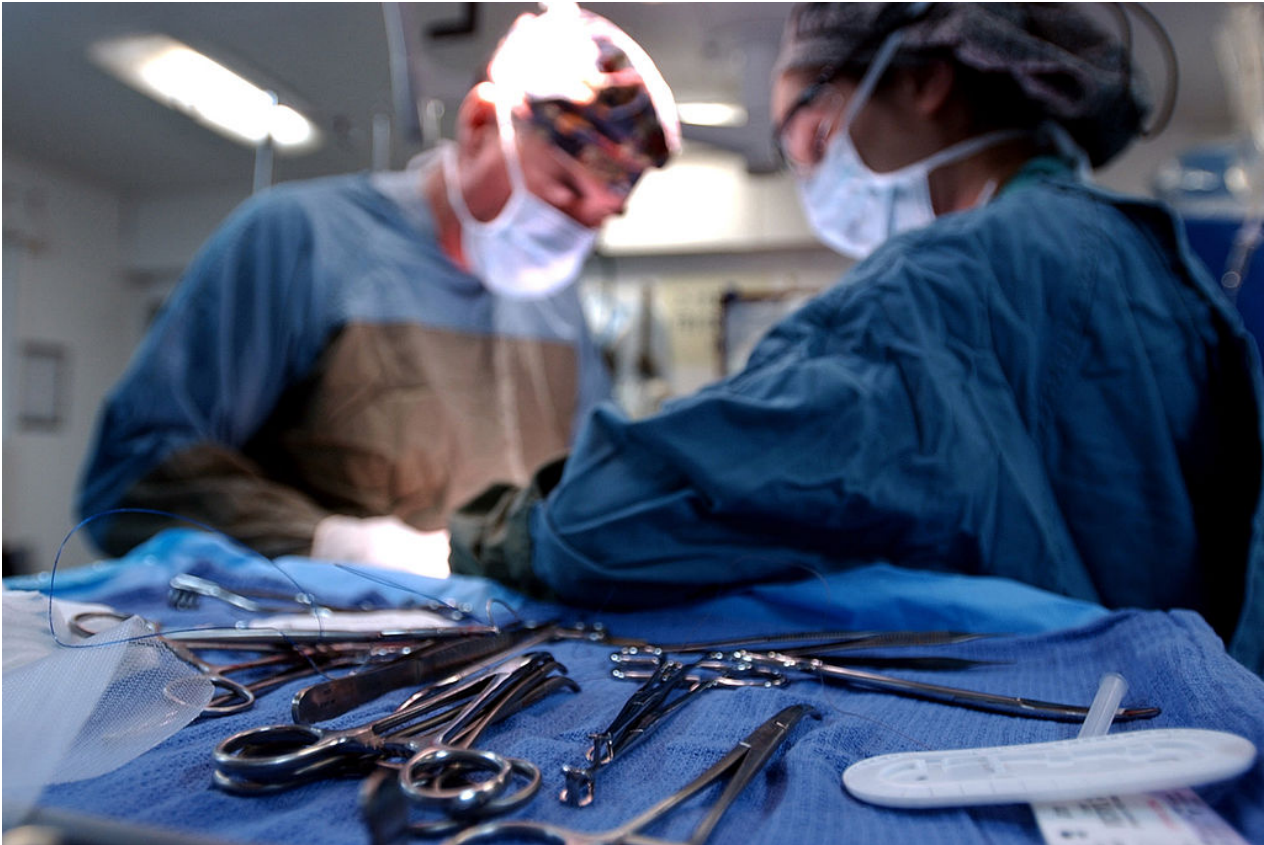

This education leaflet is designed to give you a brief and basic overview of anterior cruciate ligament reconstructive surgery

Every patient, injury and surgeon is different therefore please consult your health professional for further individual detail

Further information related to this topic can be found at:

[semrc.blogs.latrobe.edu.au](http://semrc.blogs.latrobe.edu.au)

For a great visual summary of ACL reconstructive surgery go to the following YouTube® video  
“[ACL Surgery – 3D Reconstruction](#)”

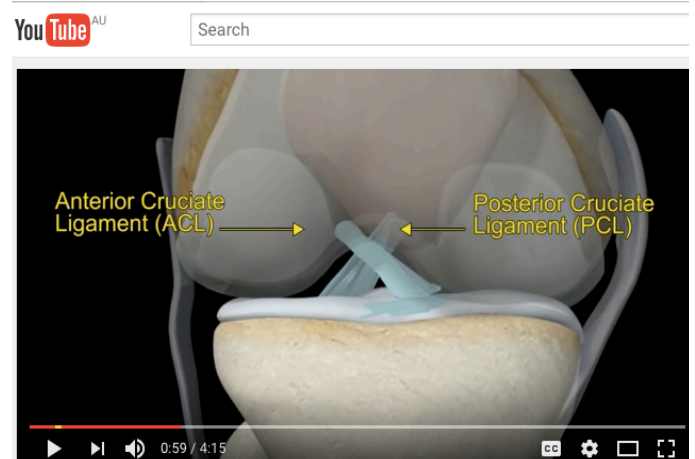

### Main Graft Types

#### Autograft

- Tendon comes from you (hamstring or patella tendon)
- Risk of rejection is low due to tissue being native (from you)

#### Preference

- Surgeon/patient dependent but outcomes are similar regardless
- E.g. patella may be preferred if previous hamstring injuries

### Hamstring and Patella Tendon Grafts

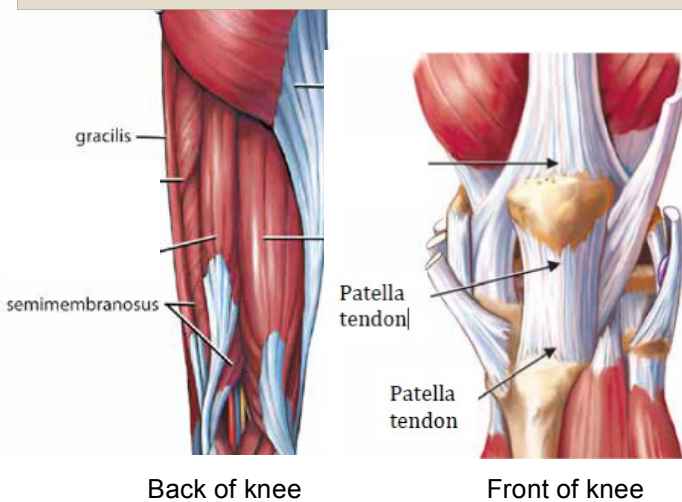

- Ice, elevation and compression
- Gentle exercise vs rest

### Other injuries

#### The difference between meniscus and cartilage

“*Cartilage*” refers to the “articular cartilage,” the smooth protective covering over the bone

The “*meniscus*” are different types of shock absorbing cartilage. They are the “C” shaped discs that sit inside the knee.

Injuries to the cartilage and/or the meniscus commonly occur at the same time as injury to the ACL.

### Other surgeries

#### Repair vs resection

Damage to cartilage or meniscus may be repaired using a variety of fixation methods (stiches/anchors). If this is not possible it may be left, or taken out/”resected”

### What to expect after surgery

#### It is normal to experience in the first few weeks:

- Pain, swelling, muscle wastage, stiffness

#### You will be given advice about:

- Use of crutches
- Pain medication

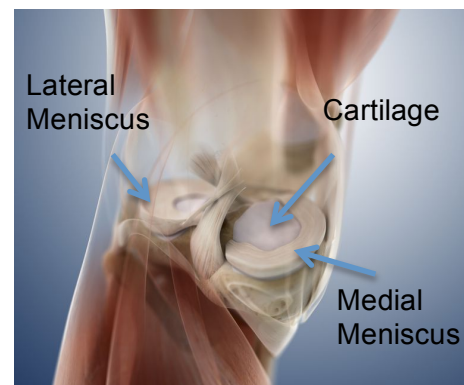

### Further information

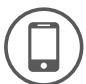

#### Website/Blog

[semrc.blogs.latrobe.edu.au/category/acl](http://semrc.blogs.latrobe.edu.au/category/acl)

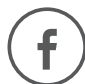

#### Facebook

[facebook.com/latrobesemrc](https://facebook.com/latrobesemrc)

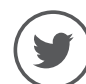

#### Twitter

[twitter.com/LaTrobeSEM](https://twitter.com/LaTrobeSEM)

## 2. Rehabilitation & Return to Sport

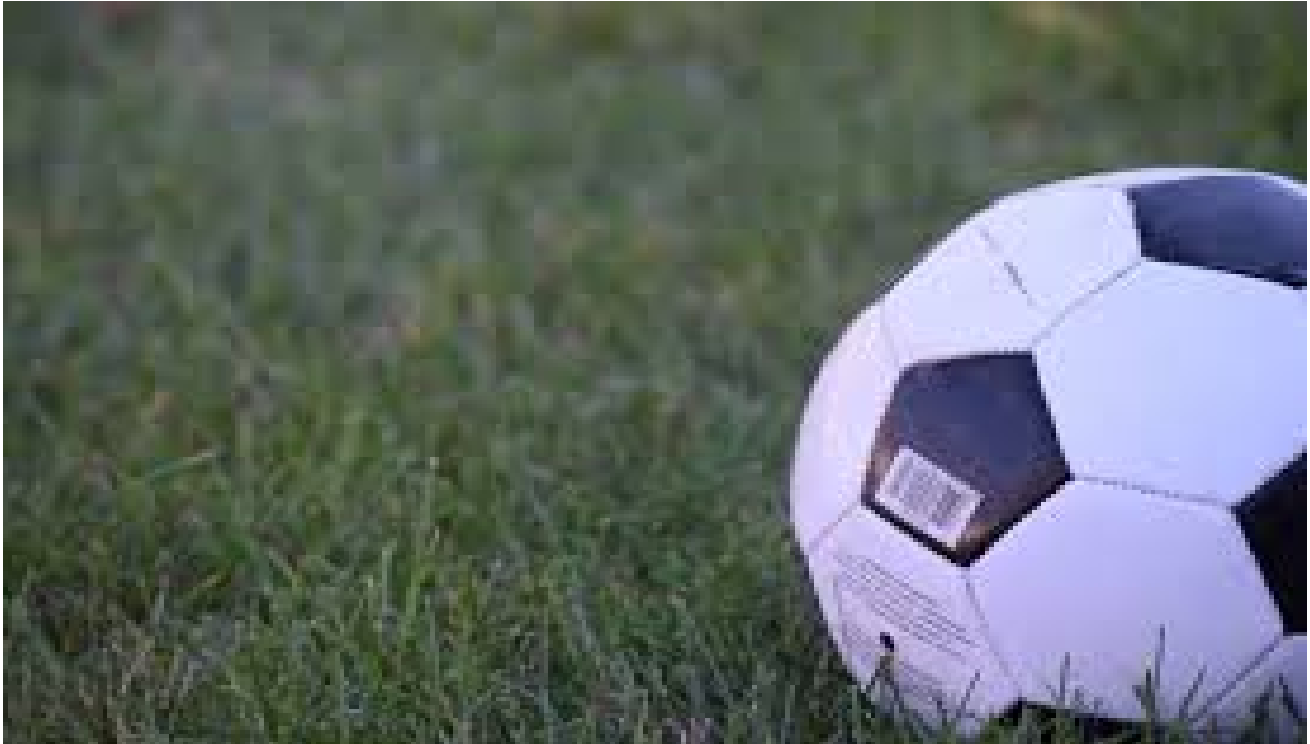

This education leaflet is designed to give you a brief and basic overview of the rehabilitation and return to sport process following anterior cruciate ligament reconstruction

Every patient, injury and surgeon is different therefore please consult your health professional for further individual detail

Further information related to this topic can be found at: [semrc.latrobe.edu.au](http://semrc.latrobe.edu.au)

Rehabilitation following anterior cruciate ligament reconstruction is challenging and at times you may wish to discontinue for a variety of reasons (cost, time, ability to self manage, decreased motivation)

**You should continue formal rehabilitation with a health professional until your operated leg is as strong as your other leg (if not stronger) to reduce the risk of re-injury and possibly future joint health**

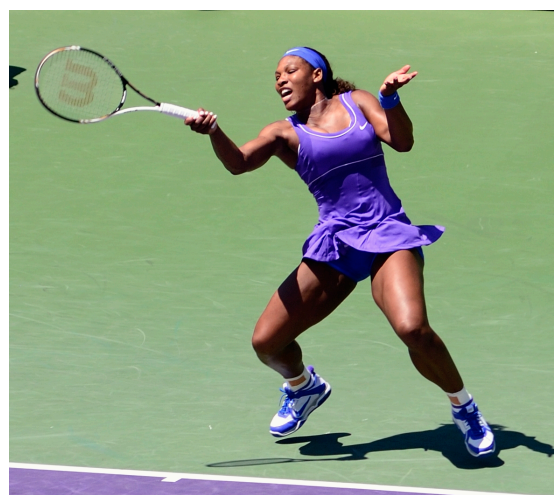

## Return to Sport Criteria

Returning to sport with ongoing strength and movement deficits may place you at risk of abnormal joint/muscle loading, or reinjury. It is therefore important to continue to see your health professional for assessment and treatment of strength/movement deficits.

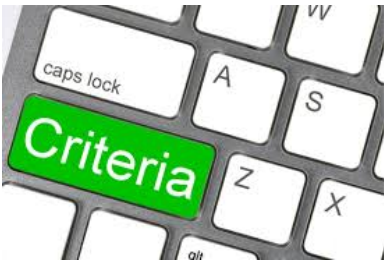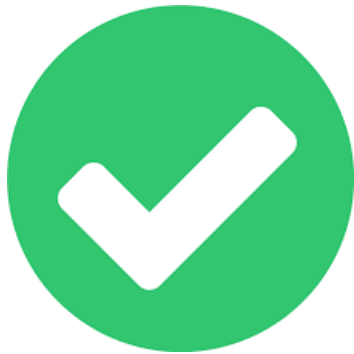

1. Nil to minimal **pain** and **swelling**
2. **Full range of motion**
3. “**Full**” **strength** of all muscle groups (= >95% of opposite side & >values for non injured people). This includes calf, quadriceps, hamstring, gluteals and trunk muscles.
4. “**Restored**” **function and movement**. I.e. walking, running, jumping, landing/cutting. This is not only how far you can run or hop but normal “movement patterns”
5. **Completed a graded return to activity**. I.e. - cardiovascular exercise non-impact exercise – running – speed/agility –modified – full training – match simulation – return to games. No more than 10% increase each week
6. **Psychological readiness** (see leaflet no. 4)

**Your physiotherapist will assist you in assessing these items formally. Achieving all of these criteria typically takes 12 months, however it can take up to 2 years.**

## What if I do not want to return to sport?

- This is a completely justified decision, however restoring full symmetry in strength and function is still important for future joint health.
- Restoring all movements is also important as it may required in a social setting (i.e. playing sport with family/children)

### Further information

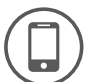

#### Website/Blog

[semrc.blogs.latrobe.edu.au/category/acl](http://semrc.blogs.latrobe.edu.au/category/acl)

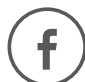

#### Facebook

[facebook.com/latrobesemrc](https://facebook.com/latrobesemrc)

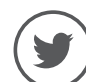

#### Twitter

[twitter.com/LaTrobeSEM](https://twitter.com/LaTrobeSEM)



### **3. Can I prevent future injury?**

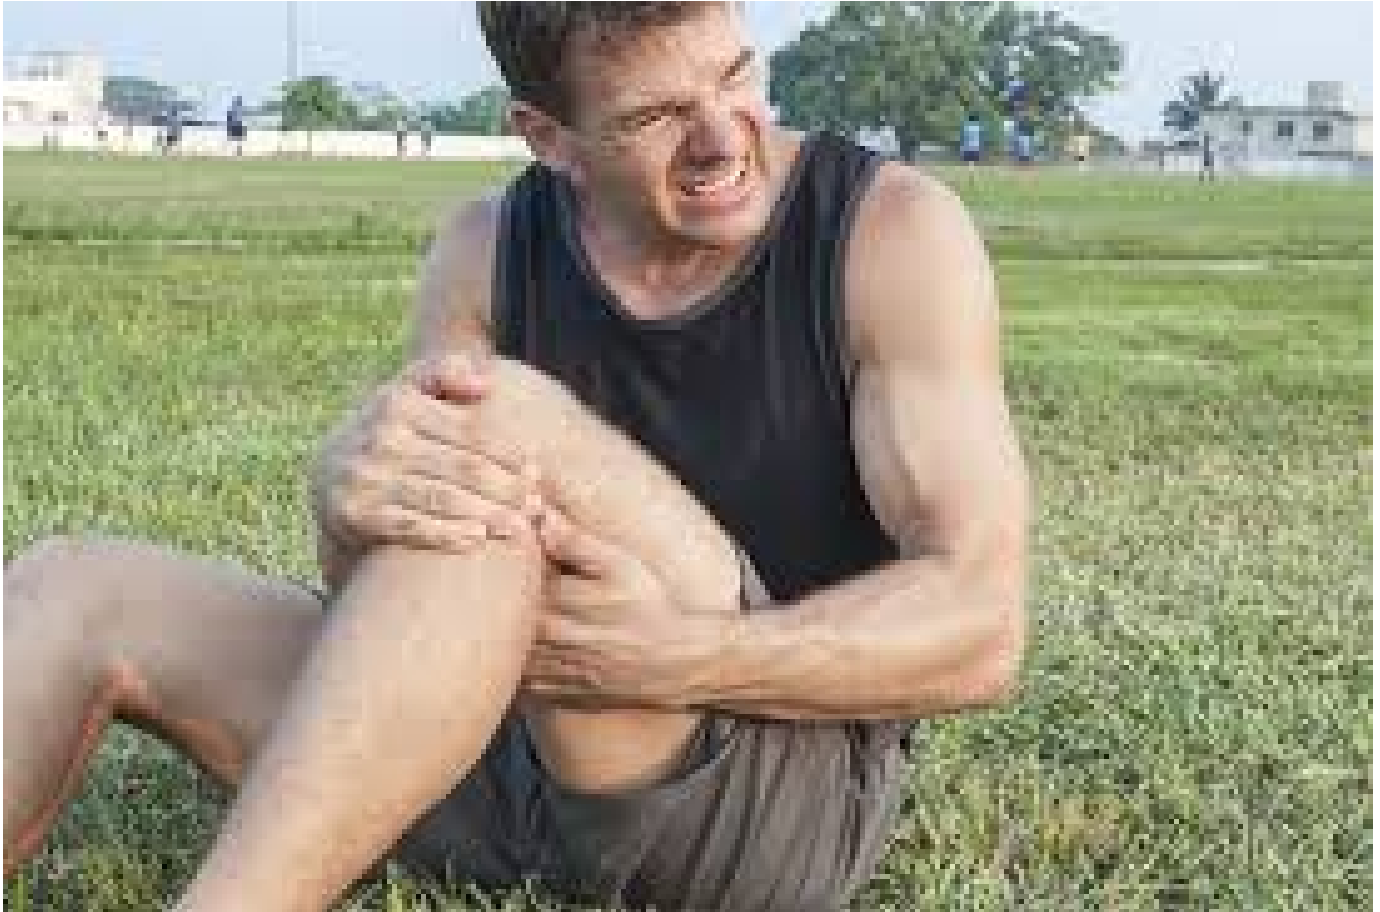

This education leaflet is designed to give you a brief and basic overview of injury prevention following anterior cruciate ligament reconstruction

Injury prevention does not just refer to acute injuries or re-rupture of the ACL, injury prevention is important for prevention of meniscus, cartilage wear and tear and all lower limb joint health.

Further information related to this topic can be found at:

[semrc.blogs.latrobe.edu.au](http://semrc.blogs.latrobe.edu.au)

Topics covered will include:

- Risk factors for re injury
- What is it and how do I do injury prevention?
- For how long?

### Risk factors for re-injury

**1. Returning to sport too early and not meeting “discharge criteria”** prior to return to sport (see leaflet no.2)

**2. “Altered movement patterns.”** People who sustain a second knee injury (re-injury/opposite leg ACL injury) land differently compared to those who do not sustain a second injury.

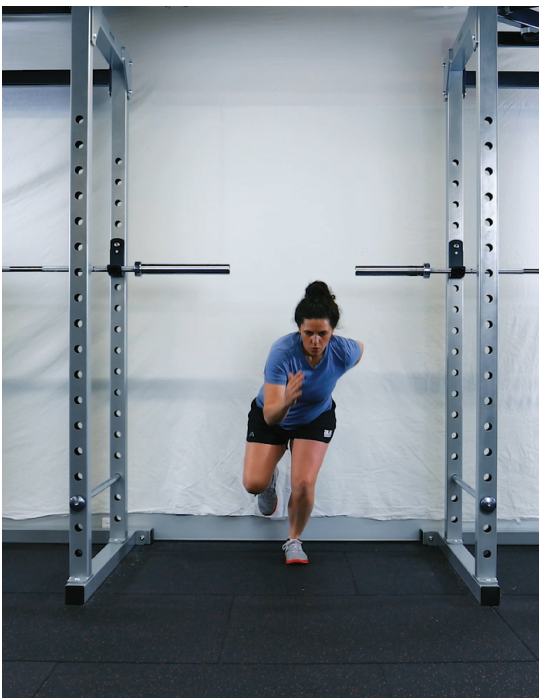

A large part of rehabilitation should include retraining movement patterns – see your health professional

### Injury Prevention Key Point 1:

#### Ongoing Rehabilitation

**A large part of injury prevention is maintaining an ongoing strength and conditioning program**

2-3 x week to maintain strength & movement patterns in combination with your leisure activities.

The types of exercises you perform may change over your life (see your health professional for program check ups if you have symptoms/functional ability changes)

**FOR LIFE?!** Strength exercises are important to continue not only for general health but to optimize loads for joint health.

2 – 3 x week in  
combination with  
sport/leisure  
activities

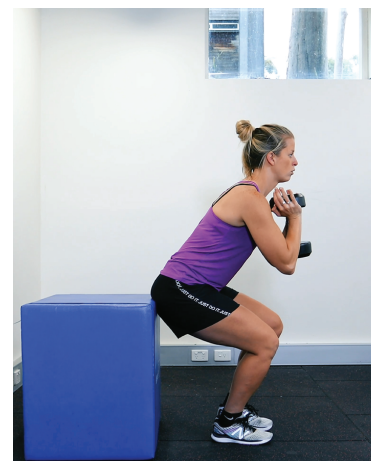

### Further information

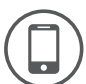

#### Website/Blog

[semrc.blogs.latrobe.edu.au/category/acl](http://semrc.blogs.latrobe.edu.au/category/acl)

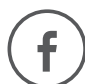

#### Facebook

[facebook.com/latrobesemrc](https://facebook.com/latrobesemrc)

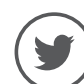

#### Twitter

[twitter.com/LaTrobeSEM](https://twitter.com/LaTrobeSEM)

## Injury Prevention Key Point 2: Injury Prevention Warm Up Programs

As well as performing your regular strength and control exercises, it is important to incorporate an **injury prevention warm up**” to fire up muscles/movement patterns before activity/sport.

Some of these programs have great videos, posters and manuals

1. **PEP program:** [http://smsmf.org/files/PEP\\_Program\\_04122011.pdf](http://smsmf.org/files/PEP_Program_04122011.pdf)
2. **FIFA 11+ program:** <http://f-marc.com/11plus/exercises/>
3. **Footy First program:** <https://footyfirstaustralia.wordpress.com/footyfirst-video-footage/>
4. **Netball Knee program:** <https://knee.netball.com.au/>
5. **Prep to Play (Australian Rules Football):** <https://coach.afl/female-football>

**Get your sporting club implementing them!**

## Injury Prevention Key Point #3

A large part of injury prevention also includes managing fatigue and load through your body. Some key things to consider may include:

- **Body weight management**
- **Load management:** Avoid large changes in intensity, type or duration of sport/exercise (no more than 10% increase per week). A simple way to measure this is through “RPE = rating of perceived exertion” x minutes of session. I.e. 7/10 difficult session x 60 minutes = 230. If you did exact session 3 x week. Total load for week = 3 x 230 = 690. Could increase to 760 next week.
- **Eat well** (see health professional if unsure)
- **Sleep well**

### Further information



**Website/Blog**

[semrc.blogs.latrobe.edu.au/category/acl](http://semrc.blogs.latrobe.edu.au/category/acl)



**Facebook**

[facebook.com/latrobesemrc](https://facebook.com/latrobesemrc)



**Twitter**

[twitter.com/LaTrobeSEM](https://twitter.com/LaTrobeSEM)

## 4. Psychological Impact of Injury

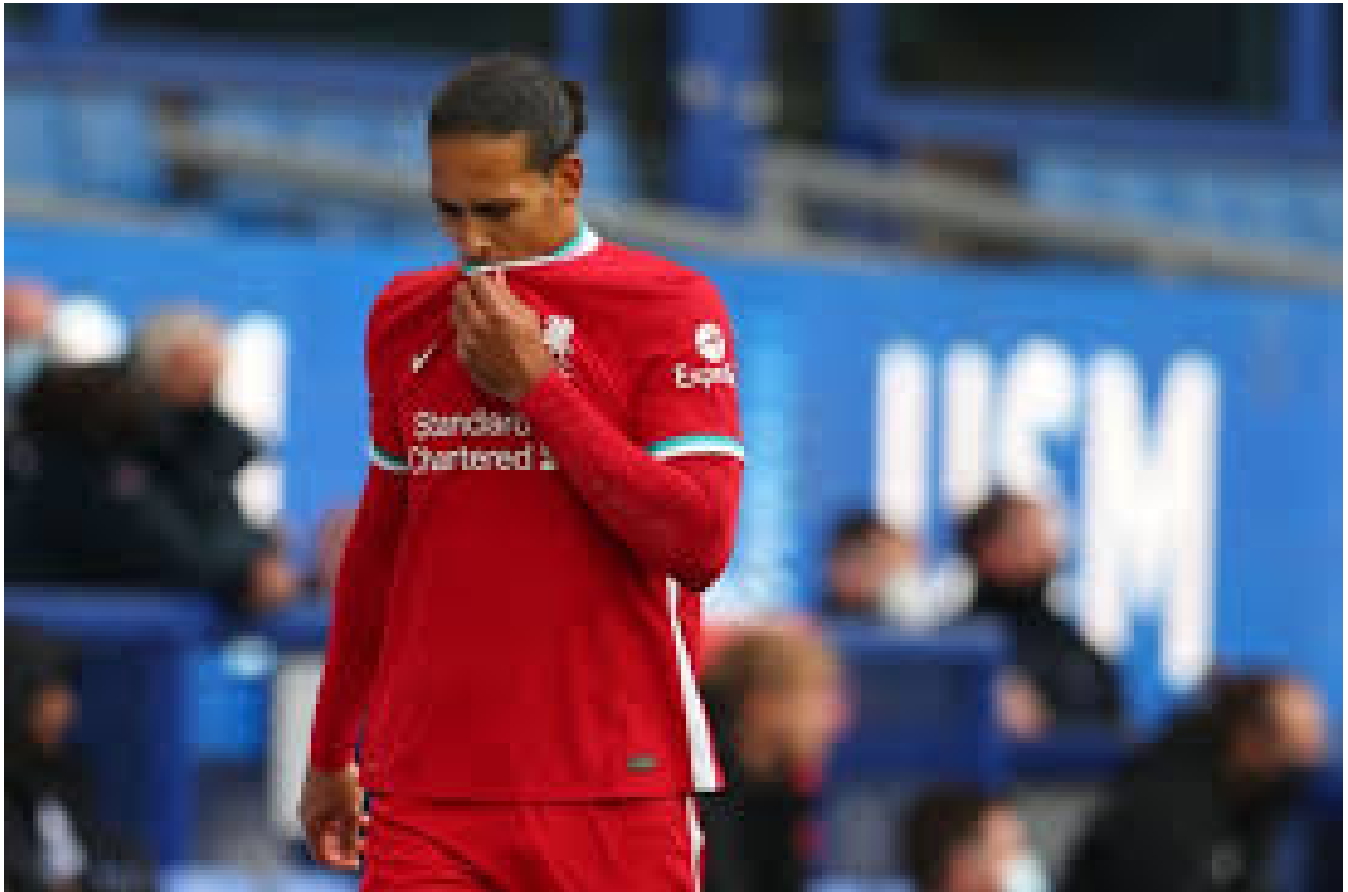

This education leaflet is designed to give you an insight into the psychological impact of anterior cruciate ligament reconstructive surgery can have

Injury will challenge each individual in different ways and if you are unsure how to best tackle any issues, please consult a qualified health professional

Further information related to this topic can be found at:

[semrc.blogs.latrobe.edu.au](http://semrc.blogs.latrobe.edu.au)

Topics covered include:

- Common struggles
- Psychological readiness for sport
- Resources available

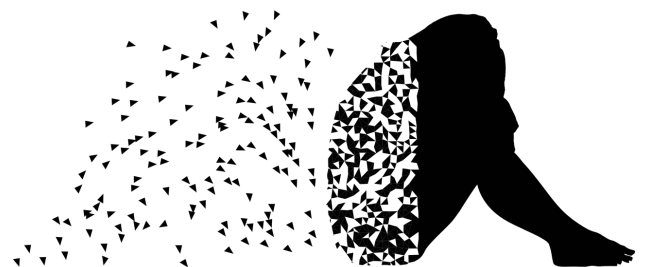

### Psychological Impact

Fear of re-injury and a lack of trust in your reconstructed knee is very common and you may be having some of the negative thoughts below. However, building strength, and gradually increasing the demands you place on your knee, realistic goal setting, will help you to feel in control.

**“It is always in the back of my mind”**

**“I have changed the way I move and play to reduce the risk of getting injured again”**

**“I will never be able to ever perform the same”**

### What can I do about it?

- **Support** from coaches, teammates. Being involved in other ways.
- **Positive** attitude/outlook/mood and motivation toward rehabilitation and return to sport, performance and skills
- Setting **realistic goals** –short and long term with your rehabilitation team along the way is important to aid in **expectations** and prevent dissatisfaction.

### Resources you can use:

- Peers that have had an ACL injury
- Your physiotherapist
- Qualified psychologist
- Online website resource created by Daniel Menzel to inspire local sports people:  
<http://www.mtmf.com.au>

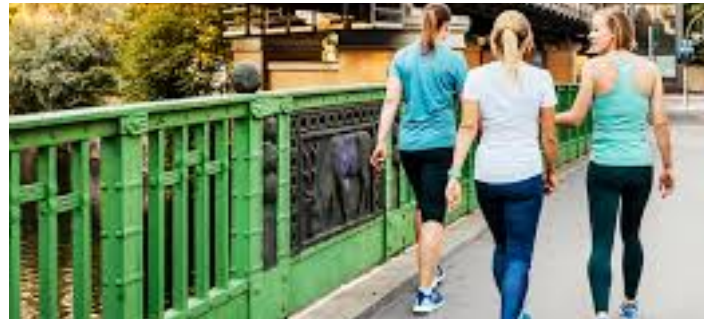

### Am I psychologically ready?

1. Prior to return to sport - **physical AND psychological readiness**

2. **ACL specific return to sport after injury questionnaire (ACL – RSI)**. Assesses emotions, confidence in performance, and fear of reinjury

**See attached copy/smartphone app**

People who return to pre injury activity level score significantly higher on the ACL RSI

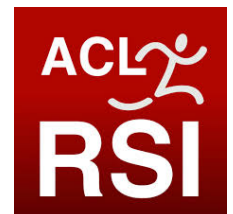

### Further information

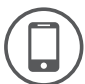

**Website/Blog**

[semrc.blogs.latrobe.edu.au/category/acl](http://semrc.blogs.latrobe.edu.au/category/acl)



**Facebook**

[facebook.com/latrobesemrc](https://facebook.com/latrobesemrc)

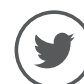

**Twitter**

[twitter.com/LaTrobeSEM](https://twitter.com/LaTrobeSEM)

ACL – RSI (RETURN TO SPORT INDEX)

**1. Are you confident that you can perform at your previous level of sport participation?**

|                          |                          |                          |                          |                          |                          |                          |                          |                          |                          |                          |
|--------------------------|--------------------------|--------------------------|--------------------------|--------------------------|--------------------------|--------------------------|--------------------------|--------------------------|--------------------------|--------------------------|
| Not at all confident     |                          |                          |                          |                          |                          |                          |                          |                          | Fully confident          |                          |
| <input type="checkbox"/> | <input type="checkbox"/> | <input type="checkbox"/> | <input type="checkbox"/> | <input type="checkbox"/> | <input type="checkbox"/> | <input type="checkbox"/> | <input type="checkbox"/> | <input type="checkbox"/> | <input type="checkbox"/> | <input type="checkbox"/> |
| 0                        | 10                       | 20                       | 30                       | 40                       | 50                       | 60                       | 70                       | 80                       | 90                       | 100                      |

**2. Do you think you are likely to re-injury your knee by participating in your sport?**

|                          |                          |                          |                          |                          |                          |                          |                          |                          |                          |                          |
|--------------------------|--------------------------|--------------------------|--------------------------|--------------------------|--------------------------|--------------------------|--------------------------|--------------------------|--------------------------|--------------------------|
| Extremely likely         |                          |                          |                          |                          |                          |                          |                          |                          | Not likely at all        |                          |
| <input type="checkbox"/> | <input type="checkbox"/> | <input type="checkbox"/> | <input type="checkbox"/> | <input type="checkbox"/> | <input type="checkbox"/> | <input type="checkbox"/> | <input type="checkbox"/> | <input type="checkbox"/> | <input type="checkbox"/> | <input type="checkbox"/> |
| 0                        | 10                       | 20                       | 30                       | 40                       | 50                       | 60                       | 70                       | 80                       | 90                       | 100                      |

**3. Are you nervous about playing your sport?**

|                          |                          |                          |                          |                          |                          |                          |                          |                          |                          |                          |
|--------------------------|--------------------------|--------------------------|--------------------------|--------------------------|--------------------------|--------------------------|--------------------------|--------------------------|--------------------------|--------------------------|
| Extremely nervous        |                          |                          |                          |                          |                          |                          |                          |                          | Not nervous at all       |                          |
| <input type="checkbox"/> | <input type="checkbox"/> | <input type="checkbox"/> | <input type="checkbox"/> | <input type="checkbox"/> | <input type="checkbox"/> | <input type="checkbox"/> | <input type="checkbox"/> | <input type="checkbox"/> | <input type="checkbox"/> | <input type="checkbox"/> |
| 0                        | 10                       | 20                       | 30                       | 40                       | 50                       | 60                       | 70                       | 80                       | 90                       | 100                      |

**4. Are you confident that your knee will not give way by playing your sport?**

|                          |                          |                          |                          |                          |                          |                          |                          |                          |                          |                          |
|--------------------------|--------------------------|--------------------------|--------------------------|--------------------------|--------------------------|--------------------------|--------------------------|--------------------------|--------------------------|--------------------------|
| Not at all confident     |                          |                          |                          |                          |                          |                          |                          |                          | Fully confident          |                          |
| <input type="checkbox"/> | <input type="checkbox"/> | <input type="checkbox"/> | <input type="checkbox"/> | <input type="checkbox"/> | <input type="checkbox"/> | <input type="checkbox"/> | <input type="checkbox"/> | <input type="checkbox"/> | <input type="checkbox"/> | <input type="checkbox"/> |
| 0                        | 10                       | 20                       | 30                       | 40                       | 50                       | 60                       | 70                       | 80                       | 90                       | 100                      |

**5. Are you confident that you could play your sport without concern for your knee?**

|                          |                          |                          |                          |                          |                          |                          |                          |                          |                          |                          |
|--------------------------|--------------------------|--------------------------|--------------------------|--------------------------|--------------------------|--------------------------|--------------------------|--------------------------|--------------------------|--------------------------|
| Not at all confident     |                          |                          |                          |                          |                          |                          |                          |                          | Fully confident          |                          |
| <input type="checkbox"/> | <input type="checkbox"/> | <input type="checkbox"/> | <input type="checkbox"/> | <input type="checkbox"/> | <input type="checkbox"/> | <input type="checkbox"/> | <input type="checkbox"/> | <input type="checkbox"/> | <input type="checkbox"/> | <input type="checkbox"/> |
| 0                        | 10                       | 20                       | 30                       | 40                       | 50                       | 60                       | 70                       | 80                       | 90                       | 100                      |

**6. Do you find it frustrating to have to consider your knee with respect to your sport?**

|                          |                          |                          |                          |                          |                          |                          |                          |                          |                          |                          |
|--------------------------|--------------------------|--------------------------|--------------------------|--------------------------|--------------------------|--------------------------|--------------------------|--------------------------|--------------------------|--------------------------|
| Extremely frustrating    |                          |                          |                          |                          |                          |                          |                          |                          | Not at all frustrating   |                          |
| <input type="checkbox"/> | <input type="checkbox"/> | <input type="checkbox"/> | <input type="checkbox"/> | <input type="checkbox"/> | <input type="checkbox"/> | <input type="checkbox"/> | <input type="checkbox"/> | <input type="checkbox"/> | <input type="checkbox"/> | <input type="checkbox"/> |
| 0                        | 10                       | 20                       | 30                       | 40                       | 50                       | 60                       | 70                       | 80                       | 90                       | 100                      |

**Further information**

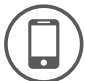

**Website/Blog**

[semrc.blogs.latrobe.edu.au/category/acl](http://semrc.blogs.latrobe.edu.au/category/acl)

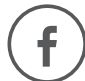

**Facebook**

[facebook.com/latrobesemrc](https://facebook.com/latrobesemrc)

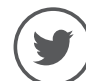

**Twitter**

[twitter.com/LaTrobeSEM](https://twitter.com/LaTrobeSEM)

ACL – RSI continued

**7. Are you fearful of re-injuring your knee by playing your sport?**

|                          |                          |                          |                          |                          |                          |                          |                          |                          |                          |                          |
|--------------------------|--------------------------|--------------------------|--------------------------|--------------------------|--------------------------|--------------------------|--------------------------|--------------------------|--------------------------|--------------------------|
| Extremely fearful        |                          |                          |                          |                          |                          |                          |                          |                          | No fear at all           |                          |
| <input type="checkbox"/> | <input type="checkbox"/> | <input type="checkbox"/> | <input type="checkbox"/> | <input type="checkbox"/> | <input type="checkbox"/> | <input type="checkbox"/> | <input type="checkbox"/> | <input type="checkbox"/> | <input type="checkbox"/> | <input type="checkbox"/> |
| 0                        | 10                       | 20                       | 30                       | 40                       | 50                       | 60                       | 70                       | 80                       | 90                       | 100                      |

**8. Are you confident about your knee holding up under pressure?**

|                          |                          |                          |                          |                          |                          |                          |                          |                          |                          |                          |
|--------------------------|--------------------------|--------------------------|--------------------------|--------------------------|--------------------------|--------------------------|--------------------------|--------------------------|--------------------------|--------------------------|
| Not at all confident     |                          |                          |                          |                          |                          |                          |                          |                          | Fully confident          |                          |
| <input type="checkbox"/> | <input type="checkbox"/> | <input type="checkbox"/> | <input type="checkbox"/> | <input type="checkbox"/> | <input type="checkbox"/> | <input type="checkbox"/> | <input type="checkbox"/> | <input type="checkbox"/> | <input type="checkbox"/> | <input type="checkbox"/> |
| 0                        | 10                       | 20                       | 30                       | 40                       | 50                       | 60                       | 70                       | 80                       | 90                       | 100                      |

**9. Are you afraid of accidentally injuring your knee by playing your sport?**

|                          |                          |                          |                          |                          |                          |                          |                          |                          |                          |                          |
|--------------------------|--------------------------|--------------------------|--------------------------|--------------------------|--------------------------|--------------------------|--------------------------|--------------------------|--------------------------|--------------------------|
| Extremely afraid         |                          |                          |                          |                          |                          |                          |                          |                          | Not at all afraid        |                          |
| <input type="checkbox"/> | <input type="checkbox"/> | <input type="checkbox"/> | <input type="checkbox"/> | <input type="checkbox"/> | <input type="checkbox"/> | <input type="checkbox"/> | <input type="checkbox"/> | <input type="checkbox"/> | <input type="checkbox"/> | <input type="checkbox"/> |
| 0                        | 10                       | 20                       | 30                       | 40                       | 50                       | 60                       | 70                       | 80                       | 90                       | 100                      |

**10. Do thoughts of having to go through surgery and rehabilitation prevent you from playing your sport?**

|                          |                          |                          |                          |                          |                          |                          |                          |                          |                          |                          |
|--------------------------|--------------------------|--------------------------|--------------------------|--------------------------|--------------------------|--------------------------|--------------------------|--------------------------|--------------------------|--------------------------|
| All of the time          |                          |                          |                          |                          |                          |                          |                          |                          | None of the time         |                          |
| <input type="checkbox"/> | <input type="checkbox"/> | <input type="checkbox"/> | <input type="checkbox"/> | <input type="checkbox"/> | <input type="checkbox"/> | <input type="checkbox"/> | <input type="checkbox"/> | <input type="checkbox"/> | <input type="checkbox"/> | <input type="checkbox"/> |
| 0                        | 10                       | 20                       | 30                       | 40                       | 50                       | 60                       | 70                       | 80                       | 90                       | 100                      |

**11. Are you confident about your ability to perform well at your sport?**

|                          |                          |                          |                          |                          |                          |                          |                          |                          |                          |                          |
|--------------------------|--------------------------|--------------------------|--------------------------|--------------------------|--------------------------|--------------------------|--------------------------|--------------------------|--------------------------|--------------------------|
| Not at all confident     |                          |                          |                          |                          |                          |                          |                          |                          | Fully confident          |                          |
| <input type="checkbox"/> | <input type="checkbox"/> | <input type="checkbox"/> | <input type="checkbox"/> | <input type="checkbox"/> | <input type="checkbox"/> | <input type="checkbox"/> | <input type="checkbox"/> | <input type="checkbox"/> | <input type="checkbox"/> | <input type="checkbox"/> |
| 0                        | 10                       | 20                       | 30                       | 40                       | 50                       | 60                       | 70                       | 80                       | 90                       | 100                      |

**12. Do you feel relaxed about playing your sport?**

|                          |                          |                          |                          |                          |                          |                          |                          |                          |                          |                          |
|--------------------------|--------------------------|--------------------------|--------------------------|--------------------------|--------------------------|--------------------------|--------------------------|--------------------------|--------------------------|--------------------------|
| Not at all relaxed       |                          |                          |                          |                          |                          |                          |                          |                          | Fully relaxed            |                          |
| <input type="checkbox"/> | <input type="checkbox"/> | <input type="checkbox"/> | <input type="checkbox"/> | <input type="checkbox"/> | <input type="checkbox"/> | <input type="checkbox"/> | <input type="checkbox"/> | <input type="checkbox"/> | <input type="checkbox"/> | <input type="checkbox"/> |
| 0                        | 10                       | 20                       | 30                       | 40                       | 50                       | 60                       | 70                       | 80                       | 90                       | 100                      |

**Further information**



**Website/Blog**  
[semrc.blogs.latrobe.edu.au/category/acl](http://semrc.blogs.latrobe.edu.au/category/acl)



**Facebook**  
[facebook.com/latrobesemrc](https://facebook.com/latrobesemrc)



**Twitter**  
[twitter.com/LaTrobeSEM](https://twitter.com/LaTrobeSEM)

## 5. Things to look out for

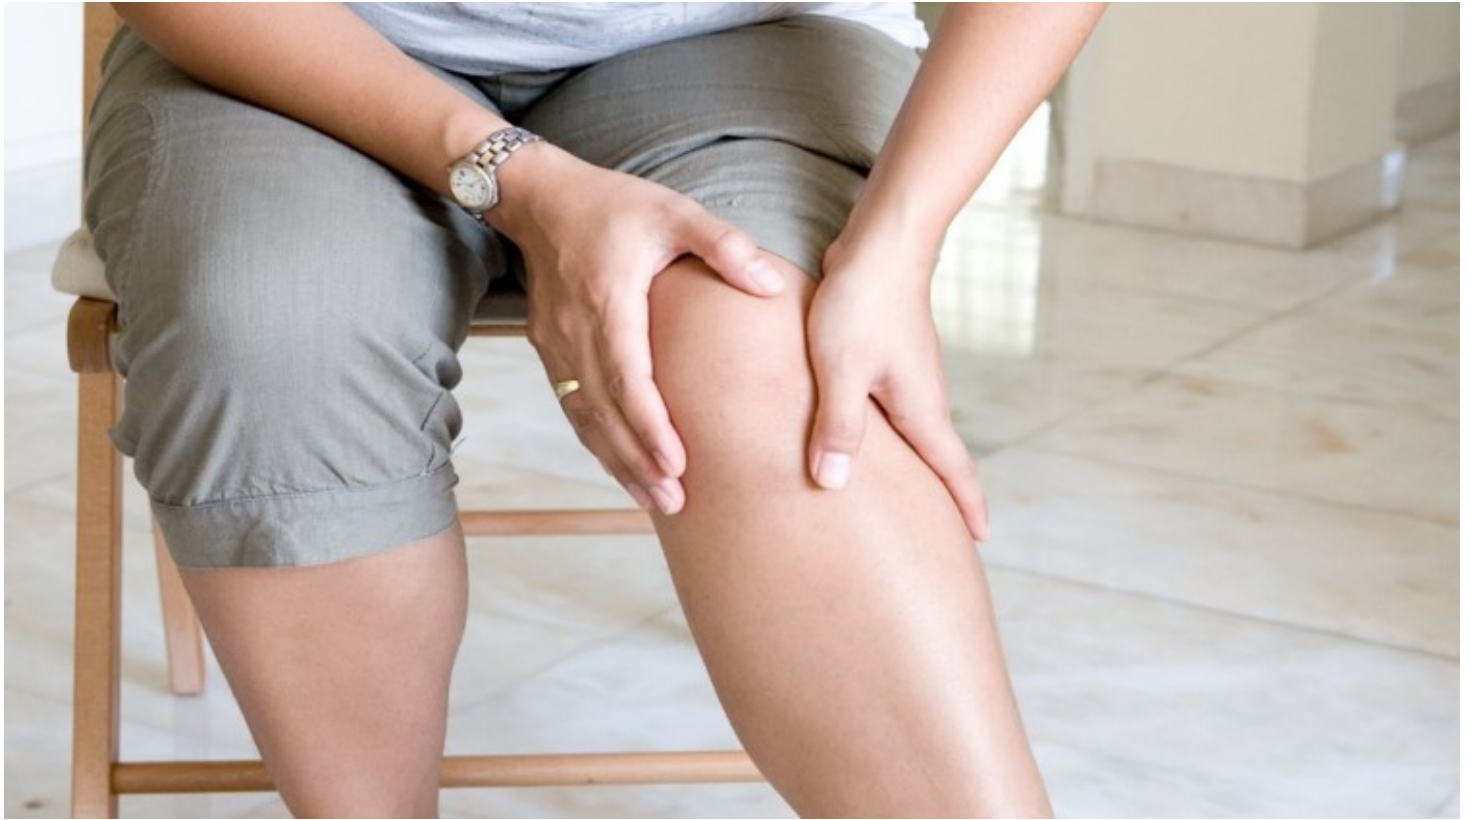

This education leaflet is designed to give you a brief and basic overview of signs and symptoms to look out for following anterior cruciate ligament reconstructive surgery

Every patient, injury and surgeon is different therefore please consult your health professional for further individual detail

Further information related to this topic can be found at:

[semrc.blogs.latrobe.edu.au](http://semrc.blogs.latrobe.edu.au)

Many people experience new symptoms and change in function of their knee, and it is important to know that this is normal and common after ACL reconstructive surgery.

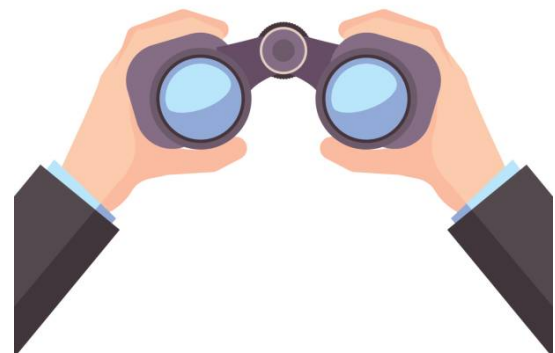



#### Future symptoms – am I at risk?

Some people experience changes in symptoms and function in the early years following their surgery, where as others it occurs much later and others not at all. It is poorly understood what puts people into these categories. And it is likely that a large variety of factors play a part in the development of symptoms.

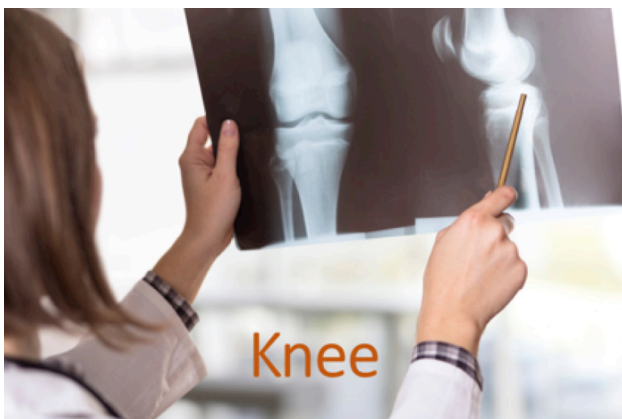

#### Key things to watch for

- New or change in pain, swelling or stiffness (at rest, during or after activity)
- Giving way
- People stating you are limping whilst walking
- Altered muscle strength or weakness

#### What is osteoarthritis? Will I get it?

Knee osteoarthritis (OA) is a common musculoskeletal condition with incidence increasing with age.

#### Isn't it just a normal part of ageing?

Now that you have had an ACL injury and surgery your knee is at greater risk of osteoarthritis (OA) development at an earlier age

#### Does surgery reduce my risk of OA?

No, it restores the stability of the knee joint but it does not reduce the risk of OA.

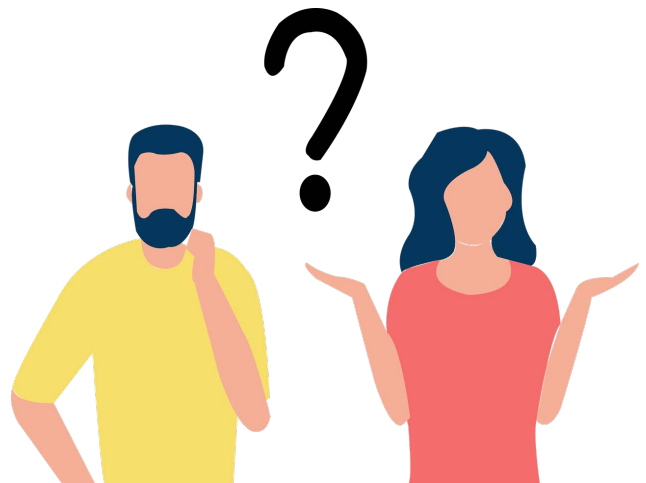

#### Further information

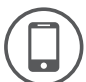

##### Website/Blog

[semrc.blogs.latrobe.edu.au/category/acl](http://semrc.blogs.latrobe.edu.au/category/acl)



##### Facebook

[facebook.com/latrobesemrc](https://facebook.com/latrobesemrc)



##### Twitter

[twitter.com/LaTrobeSEM](https://twitter.com/LaTrobeSEM)

OSTEOARTHRITIS – General Population

**Knee OA (on X-ray)**

1% aged between 25 - 34 years  
15 – 30% aged 55 years  
50% aged > 75 years

- Cartilage begins to thin
- Small bone spurs/cysts
- Space between joint becomes smaller

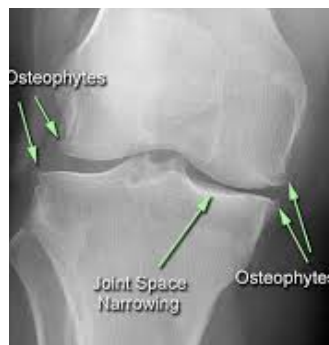

**Knee pain/symptoms**

<1% aged 25 - 34 years  
20% aged 55 years  
25% aged > 75 years

- Pain,
- Stiffness,
- Swelling,
- Loss of strength/function

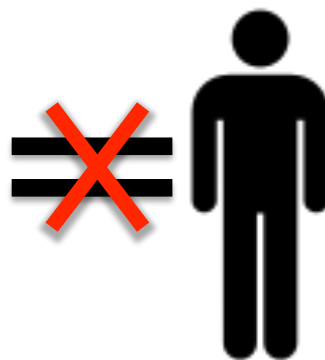

**THESE DO NOT ALWAYS MATCH UP**

I.e. you can have degenerative changes on X-ray but NO symptoms or vice

OSTEOARTHRITIS – Following ACL Reconstruction

**OA after ACL reconstruction is common and NOT always associated with symptoms**

- 1 year following ACL reconstruction: 5% (I.e. aged 18 – 40)
- 15 years following ACL reconstruction: 50% (I.e. aged 35 – 60)

What can I do about it?

- **Graded exercises and return to activity** following injury is important to ensure the knee joint is gradually loaded.
- Progression based on **achieving strength/functional goals** not a time point
- Continue **seeing health care professional** until all deficits are restored
- Keep strong and maintain good function
- **Healthy diet and weight** (seek professional help if unsure)

Further information

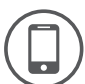

**Website/Blog**  
[semrc.blogs.latrobe.edu.au/category/acl](http://semrc.blogs.latrobe.edu.au/category/acl)



**Facebook**  
[facebook.com/latrobesemrc](https://facebook.com/latrobesemrc)

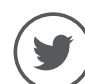

**Twitter**  
[twitter.com/LaTrobeSEM](https://twitter.com/LaTrobeSEM)

# RETURN TO RUNNING

Prior to commencing a running program, it is best to ensure the knee is strong enough in all appropriate muscle groups, the patient has good neuromuscular control and has pre emptied running with other forms of cardiovascular load

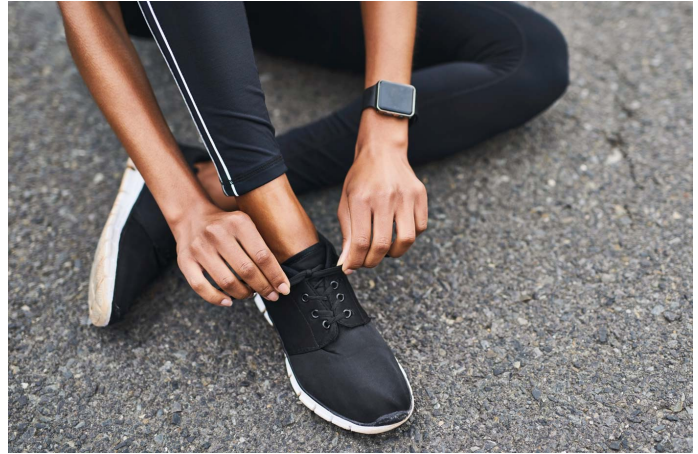

|              | Pain   | Swelling | Strength                                                 | Strength                                                                                                                                                       | Strength                                                                                    | Cardiovascular                                             |
|--------------|--------|----------|----------------------------------------------------------|----------------------------------------------------------------------------------------------------------------------------------------------------------------|---------------------------------------------------------------------------------------------|------------------------------------------------------------|
| Patient Name | < 2/10 | Zero-1+  | 1RM SQUAT 50-70% BW<br><br>OR<br><br>SL Leg Press 1.0 BW | > 90% LSI SL glut bridge and > 10<br><br>> 90% LSI SL calf raise and >15<br><br>> 70% LSI hamstring at 45 and 15 degrees<br><br>>90% LSI side bridge and > 30s | >22 One Leg Rise Test (modified height)<br><br>AND<br><br>Pass SL Squat functional criteria | Completes 30 minutes continuous CVS exercise<br>≥ 3 x week |
| Date:        |        |          |                                                          |                                                                                                                                                                |                                                                                             |                                                            |
| Date:        |        |          |                                                          |                                                                                                                                                                |                                                                                             |                                                            |

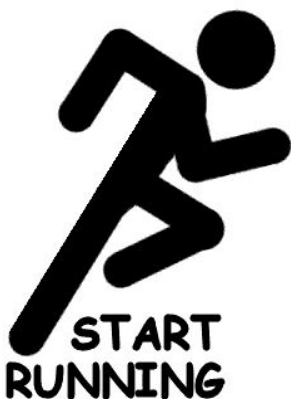

## How much do I run?

The knee will best respond to gradual load. Sometimes walk – jog is recommended. As a basic rule, don't increase total load/distance by more than 15% each week.

See Section 9 – Example of Graded Running Program

Depends on your sport/goals

| DATE:                               | MODIFIED MELBOURNE RETURN TO SPORT SCORE     |                                                                                                                                                                                                                                                |                                          |             |
|-------------------------------------|----------------------------------------------|------------------------------------------------------------------------------------------------------------------------------------------------------------------------------------------------------------------------------------------------|------------------------------------------|-------------|
| PART A                              | Raw Score                                    | Limb symmetry index % / Scoring system                                                                                                                                                                                                         |                                          | Converted   |
| Effusion: Stroke test               |                                              | Absent: 5 pts Present: 0 pts                                                                                                                                                                                                                   |                                          | /5          |
| Stability: Lachman's                |                                              | Nil: 5 pts                                                                                                                                                                                                                                     | Mild: 3 pts Moderate: 0 pts              | /5          |
| Flexion: Supine                     | Left: Right:                                 | 0-5°deficit: 5 pts                                                                                                                                                                                                                             | 5-20°deficit: 3 pts, >20°: 0 pts         | /5          |
| Extension: Prone leg hang           | Left: Right:                                 | 0-2cm deficit: 5 pts                                                                                                                                                                                                                           | 2-5cm deficit: 3 pts >5cm deficit: 0 pts | /5          |
| <b>Total Part A</b>                 |                                              |                                                                                                                                                                                                                                                |                                          | <b>/20</b>  |
| <b>PART B:</b><br>ACL-RSI (Via App) | /120                                         |                                                                                                                                                                                                                                                | X 100 = % Score                          | Divide by 5 |
| <b>Total Part B</b>                 |                                              |                                                                                                                                                                                                                                                |                                          | <b>/20</b>  |
| <b>PART C</b>                       |                                              | Otherwise score 0                                                                                                                                                                                                                              |                                          |             |
| Star excursion Balance              | Left: Ant: PM: PL:<br>Right: Ant: PM: PL:    | LSI > 95% all three directions= 3 points                                                                                                                                                                                                       | > Normative value = 2 points             | /5          |
| Single Hop                          | Left<br>Right                                | LSI > 95% = 3 points                                                                                                                                                                                                                           | > Normative value = 2 points             | /5          |
| Side Hop                            | Left<br>Right                                | LSI > 95% = 3 points                                                                                                                                                                                                                           | > Normative value = 2 points             | /5          |
| One Leg Rise                        | Left<br>Right                                | LSI > 95% = 3 points                                                                                                                                                                                                                           | > Normative value = 2 points             | /5          |
| Hamstring Strength                  | Left (SL hamstring bridge max reps)<br>Right | LSI > 95% = 3 points                                                                                                                                                                                                                           | > Normative value = 2 points             | /5          |
| Hip strength                        | Left (Abduction HHD)<br>Right                | LSI > 95% = 3 points                                                                                                                                                                                                                           | > Normative value = 2 points             |             |
| Squat                               | BW: Squat load:<br>RM:                       | External load: 50% BW 6RM = 1 point, 75% BW 6RM = 3 points, 100% BW 6RM = 5 points                                                                                                                                                             |                                          | /5          |
| Quality of Movement                 | LESS SCORE:                                  | Excellent (0-3 points on LESS): award 5 points<br>Good (3-6 points on LESS): award 2 points<br>Poor (> 6 points on LESS): award 0 points<br>(Score 0 if landing, running or agility program not yet completed to required dosage* see program) |                                          |             |
|                                     | Double leg land:                             |                                                                                                                                                                                                                                                |                                          | /5          |
|                                     | Left leg land:                               |                                                                                                                                                                                                                                                |                                          | /5          |
|                                     | Right leg land:                              |                                                                                                                                                                                                                                                |                                          | /5          |
|                                     | Agility:                                     |                                                                                                                                                                                                                                                |                                          | /5          |
| <b>Total Part C</b>                 |                                              |                                                                                                                                                                                                                                                |                                          | <b>/60</b>  |
| <b>SCORE</b>                        |                                              |                                                                                                                                                                                                                                                |                                          | <b>/100</b> |

## Pain

| Test Description                                                                                                                                                                                                                                                                                      | Scoring                                                                                                                                        | Goal/Pass                                                 |
|-------------------------------------------------------------------------------------------------------------------------------------------------------------------------------------------------------------------------------------------------------------------------------------------------------|------------------------------------------------------------------------------------------------------------------------------------------------|-----------------------------------------------------------|
| <ol style="list-style-type: none"> <li>1. Ask the patient if they have had knee pain in the last week where is that pain.</li> <li>2. Ask the patient when they experience this pain</li> <li>3. Ask the patient to rate the pain /10 on VAS scale (0 no pain to 10 worst imaginable pain)</li> </ol> | <p>Location: AM PFJ (anterior medial patellofemoral).</p> <p>When: ie. During running/particular exercise</p> <p>Intensity: / 10 VAS scale</p> | For any progression must have <2/10 during/after activity |

## Swelling

| Test Description                                                                                                                                                                                                                                                                                                                                                                                                                                                | Scoring                                                                                                                                                                                                                                                                                                                                      | Goal/Pass                                |
|-----------------------------------------------------------------------------------------------------------------------------------------------------------------------------------------------------------------------------------------------------------------------------------------------------------------------------------------------------------------------------------------------------------------------------------------------------------------|----------------------------------------------------------------------------------------------------------------------------------------------------------------------------------------------------------------------------------------------------------------------------------------------------------------------------------------------|------------------------------------------|
| <p><b>Effusion</b></p> <p><i>Stroke Test:</i></p> <p>Supine, knee in full extension and relaxed. Hand beneath medial tibiofemoral joint line, stroke hand upwards towards suprapatellar bursa for a 2-3 times in sweeping motion in attempt to move effusion from the inside of the joint to suprapatellar pouch. Then stroke downwards on the lateral aspect of the knee (thigh), just superior to the suprapatellar bursa towards the lateral joint line.</p> | <p>Zero: no wave produced on downstroke</p> <p>Trace: small wave on medial side with downstroke</p> <p>1+: Large bulge on medial side with downstroke</p> <p>2+: Effusion spontaneously returns to medial side after upstroke</p> <p>3+: So much fluid that it is not possible to move the effusion out of the medial aspect of the knee</p> | For any progression must have: Zero – 1+ |

## Range of Motion

| Test Description                                                                                                                                                             | Scoring                                                        | Goal/Pass     |
|------------------------------------------------------------------------------------------------------------------------------------------------------------------------------|----------------------------------------------------------------|---------------|
| <p><b>Flexion</b></p> <p>Patient supine slide heel up towards bottom</p> <p>Keep heel and pelvis on ground</p> <p>Active movement no passive help from hand or therapist</p> | <p>Goniometer in degrees</p> <p>Record any pain / catching</p> | 0 – 5 deficit |

|                                                                                                                                                                                                           |                                                                    |        |
|-----------------------------------------------------------------------------------------------------------------------------------------------------------------------------------------------------------|--------------------------------------------------------------------|--------|
| <b>Extension</b><br>Prone leg hang<br>Knees on edge of plinth but not off<br>Relax lower leg and feet<br>Measure heel height difference without placing pressure on heel<br>Use inclinometer if available | Centimetre heel height difference<br>Record ACLR or CL more flexed | < 2 cm |
|-----------------------------------------------------------------------------------------------------------------------------------------------------------------------------------------------------------|--------------------------------------------------------------------|--------|

**Stability**

| Test Description                                                                                                                                                             | Scoring (for return to sport score)                            | Goal/Pass |
|------------------------------------------------------------------------------------------------------------------------------------------------------------------------------|----------------------------------------------------------------|-----------|
| <b>Lachman's test</b><br>Knee flexed 20-30 degrees in supine<br>One hand behind tibia and other grasping thigh<br>Thumb on tibial tuberosity<br>Use other side as comparison | Nil (laxity): 5 points<br>Mild: 3 points<br>Moderate: 0 points | NA        |

**TASK 1: Movement Retraining**

To move to next phase / type of movement retraining the following must be achieved

| Test Description                                                                                                               | Scoring                                                                                   | Goal/Pass         |
|--------------------------------------------------------------------------------------------------------------------------------|-------------------------------------------------------------------------------------------|-------------------|
| <b>Double Leg Landing</b><br>- Double leg land LESS (Landing Error Scoring System)                                             | Excellent = 0 – 3 points<br>Good = 4-5 points<br>Moderate = 6 points<br>Poor = < 6 points | Excellent         |
| <b>Single Leg Landing (ACLR and CL)</b><br>- Single leg land Modified LESS (Landing Error Scoring System)                      | Excellent = 0 – 3 points<br>Good = 4-5 points<br>Moderate = 6 points<br>Poor = < 6 points | Excellent         |
| <b>Running</b><br>- “Return to Running Criteria” see attached (pain, swelling, strength, function, graded CV program criteria) | See attached                                                                              | Pass all measures |
| <b>Agility</b><br>- Modified movement error scoring system                                                                     | Excellent = 0 – 3 points<br>Good = 4-5 points<br>Moderate = 6 points<br>Poor = < 6 points | Excellent         |

## DOUBLE LEG LANDING ERROR SCORING

|            |                                                                      |                                                              |
|------------|----------------------------------------------------------------------|--------------------------------------------------------------|
| Front view | Lateral (side) trunk flexion at contact – trunk is flexed            | Yes=0, No=1                                                  |
|            | Knee valgus angle at contact – knees over the midfoot                | Yes=0, No=1                                                  |
|            | Knee valgus displacement – knees inside of large toe                 | Yes=1, No=0                                                  |
|            | Foot position at contact - toes pointing out greater than 30 degrees | Yes=1, No=0                                                  |
|            | Foot position at contact - toes pointing out less than 30 degrees    | Yes=1, No=0                                                  |
|            | Stance width at contact - less than shoulder width                   | Yes=1, No=0                                                  |
|            | Stance width at contact - greater than shoulder width                | Yes=1, No= 0                                                 |
|            | Initial foot contact – symmetric                                     | Yes=0, No=1                                                  |
| Side View  | Hip flexion angle at contact – hips are flexed                       | Yes=0, No=1                                                  |
|            | Trunk flexion angle at contact – trunk in front of hips              | Yes=0, No=1                                                  |
|            | Knee flexion angle at contact – greater than 30 degrees              | Yes=0, No=1                                                  |
|            | Ankle plantar flexion angle at contact – toe to heel                 | Yes=0, No=1                                                  |
|            | Hip flexion at max knee flexion angle – greater than at contact      | Yes=0, No=1                                                  |
|            | Trunk flexion at max knee flexion – trunk in front of the hips       | Yes=0, No=1                                                  |
|            | Knee flexion displacement – greater than 30 degrees                  | Yes=0, No=1                                                  |
|            | Sagittal plane joint displacement                                    | Large motion (soft) = 0, Average = 1, Small (loud/stiff) =2) |
|            | Overall Impression                                                   | Excellent = 0, Average = 1, Poor = 2                         |

## SINGLE LEG LANDING ERORR SCORING

|            | LEFT                                                                           | SCORE:      |
|------------|--------------------------------------------------------------------------------|-------------|
| Front view | <i>Lateral (side) trunk flexion at contact –excessively flexed to the side</i> | Yes=1, No=0 |
|            | Knee valgus angle at contact – knees over the midfoot                          | Yes=0, No=1 |
|            | Knee valgus displacement – knees inside of large toe                           | Yes=1, No=0 |
|            | Foot position at contact - toes pointing out greater than 30 degrees           | Yes=1, No=0 |
|            | Foot position at contact - toes pointing out less than 30 degrees              | Yes=1, No=0 |
|            | <i>Pelvic movement – lateral deviation or shunt or pelvic drop</i>             | Yes=1, No=0 |
|            | <i>Hip is adducted</i>                                                         | Yes=1, No=0 |
|            | <i>Maintains balance on one leg</i>                                            | Yes=0, No=1 |
| Side View  | Hip flexion angle at contact – hips are flexed                                 | Yes=0, No=1 |
|            | Trunk flexion angle at contact – trunk in front of hips                        | Yes=0, No=1 |
|            | Knee flexion angle at contact – greater than 30 degrees                        | Yes=0, No=1 |
|            | Ankle plantar flexion angle at contact – toe to heel                           | Yes=0, No=1 |
|            | Hip flexion at max knee flexion angle – greater than at contact                | Yes=0, No=1 |
|            | Trunk flexion at max knee flexion – trunk in front of the hips                 | Yes=0, No=1 |

|  |                                                     |                                                             |
|--|-----------------------------------------------------|-------------------------------------------------------------|
|  | Knee flexion displacement – greater than 30 degrees | Yes=0, No=1                                                 |
|  | Sagittal plane joint displacement                   | Large (large/soft) = 0, Average = 1, Small (loud/stiff) =2) |
|  | Overall Impression                                  | Excellent = 0, Average = 1, Poor = 2                        |

## AGILITY MOVEMENT SCORING

|                 |                                                                                                  |                                      |
|-----------------|--------------------------------------------------------------------------------------------------|--------------------------------------|
|                 | LEFT                                                                                             | SCORE:                               |
| View from front | Frontal plane foot placement > 1 foot away from CoM                                              | Yes=1, No=0                          |
|                 | Upright (<45 hip knee flexion)                                                                   | Yes=0, No=1                          |
|                 | Excessive torso lean away from direction going                                                   | Yes=1, No=0                          |
|                 | Foot position at contact - toes pointing out greater than 30 degrees opposite to direction going | Yes=1, No=0                          |
|                 | Excessive torso rotation away from direction going                                               | Yes=1, No=0                          |
|                 | Overall Impression                                                                               | Excellent = 0, Average = 1, Poor = 2 |

### TASK 2: Squats

| Test Description                                                                                                                                                         | Scoring                                      | Goal/Pass                                                                                                                        |
|--------------------------------------------------------------------------------------------------------------------------------------------------------------------------|----------------------------------------------|----------------------------------------------------------------------------------------------------------------------------------|
| <b>Squat</b><br>- When reviewing exercise program note the maximum weight patient can lift for each exercise with safety in mind, good technique, alignment and no pain. | Record in log book<br>- Load and repetitions | Return to running: 50% BW 6RM<br><br>Return to sport<br>50% BW 6RM = 1 point,<br>75% BW 6RM = 3 points<br>100% BW 6RM = 5 points |
| <b>Leg Press (if available can be used for interlimb differences)</b><br>- 1RM Single Leg<br>- Perform adequate warm up at lower weights                                 | R and L KG/pounds                            | Return to running: 1.0 x BW 1RM<br><br>Return to sport: 1.5 x BW 1RM                                                             |

### TASK 3: Balance

| Test Description                                                                                                                                                                                                  | Scoring                                | Goal/Pass                                |
|-------------------------------------------------------------------------------------------------------------------------------------------------------------------------------------------------------------------|----------------------------------------|------------------------------------------|
| <b>Single Leg Stance</b><br>- Arms crossed over chest<br>- Hip and knee maintained at 90 degrees<br>- Functional alignment maintained (i.e. no lateral deviation/flexion of the trunk, hips level, trunk neutral. | Max number seconds<br>Best of 3 trials | Return to running/sport: 10s eyes closed |



|                                                                                                                                                                                                                                                                                                                                                                                                                                |                                                                                                 |                                                                                                                                                           |
|--------------------------------------------------------------------------------------------------------------------------------------------------------------------------------------------------------------------------------------------------------------------------------------------------------------------------------------------------------------------------------------------------------------------------------|-------------------------------------------------------------------------------------------------|-----------------------------------------------------------------------------------------------------------------------------------------------------------|
| <p><b>Star Excursion Balance Test</b></p> <ul style="list-style-type: none"> <li>- Shoes off, hands on hips, minimal stance foot movement allowed (ie rotation or lift)</li> <li>- Trunk movement allowed if controlled movement</li> <li>- Most distal toe for anterior on line, Heel for posterior directions</li> <li>- 2 practice trials each leg, 3 good trials on each, continue until plateau of performance</li> </ul> | <p>Record best trial</p> <p>Anterior: cm<br/>Posterior medial: cm<br/>Posterior lateral: cm</p> | <p>Return to sport:</p> <p>LSI &gt; 95% all three direction = 3 points</p> <p>&gt; Normative value for age/gender = 2 points</p> <p>Otherwise score 0</p> |
|--------------------------------------------------------------------------------------------------------------------------------------------------------------------------------------------------------------------------------------------------------------------------------------------------------------------------------------------------------------------------------------------------------------------------------|-------------------------------------------------------------------------------------------------|-----------------------------------------------------------------------------------------------------------------------------------------------------------|

#### TASK 4 and 6 (Hip Abductors + Trunk)

| Test Description                                                                                                                                                                                                                        | Scoring                   | Goal                                                          |
|-----------------------------------------------------------------------------------------------------------------------------------------------------------------------------------------------------------------------------------------|---------------------------|---------------------------------------------------------------|
| <p><b>Side bridge</b></p> <ul style="list-style-type: none"> <li>- Knees bent</li> <li>- Shoulder, hips, knee and ankle in line</li> <li>- Hips fully extended</li> <li>- Continue until unable to maintain correct position</li> </ul> | <p>Max number seconds</p> | <p>Return to running/sport:<br/>&gt; 95% LSI<br/>&gt; 30s</p> |

#### TASK 5: Calf

| Test Description                                                                                                                                                                                                                                                                                                                                                                                          | Scoring                                     | Goal                                                                                                  |
|-----------------------------------------------------------------------------------------------------------------------------------------------------------------------------------------------------------------------------------------------------------------------------------------------------------------------------------------------------------------------------------------------------------|---------------------------------------------|-------------------------------------------------------------------------------------------------------|
| <p><b>Calf</b></p> <ul style="list-style-type: none"> <li>- Single Leg Heel Raise on edge of step (knees bent and straight)</li> <li>- Elevate as high as possible</li> <li>- Assessor places hand above head at highest point</li> <li>- 1 repetition every 2 seconds, to touch assessor hand</li> <li>- Stop as soon as unable to raise to original height or slows below the cadence above.</li> </ul> | <p>Maximum number of reps<br/>Max at 40</p> | <p>Return to running/sport:<br/>&gt; 95% LSI<br/>&gt; 25 reps</p> <p>Both knees bent and straight</p> |

#### TASK 7: Gluteal/Hamstring

| Test Description                                                                                                                                                                                                                                                                                                                                                                                                                                                                                                                                                                                                                                        | Scoring                                                                                                     | Goal                                                                                                                                                                                                                                                                                                                                                                                            |
|---------------------------------------------------------------------------------------------------------------------------------------------------------------------------------------------------------------------------------------------------------------------------------------------------------------------------------------------------------------------------------------------------------------------------------------------------------------------------------------------------------------------------------------------------------------------------------------------------------------------------------------------------------|-------------------------------------------------------------------------------------------------------------|-------------------------------------------------------------------------------------------------------------------------------------------------------------------------------------------------------------------------------------------------------------------------------------------------------------------------------------------------------------------------------------------------|
| <p><b>Hamstring Option 1 – Hand held dynamometry</b></p> <ul style="list-style-type: none"> <li>- Patient lying prone</li> <li>- Measure at 15 degrees KF and 45 degrees KF</li> <li>- Hand held dynamometer 3 trials</li> <li>-</li> </ul> <p><b>Hamstring Option 2 - Maximum single leg hamstring bridge (used for return to sport score)</b></p> <ul style="list-style-type: none"> <li>- Patient supine so HF 30, KF 30 foot on chair/plinth</li> <li>- Tester to identify max height of full hip extension</li> <li>- Place ruler across pelvis to ensure patient reaches this height with each rep</li> <li>- X 2 practice repetitions</li> </ul> | <p>Record at both 15 and 45 degrees average newtons</p><br><p>Record number of repetitions for each leg</p> | <p>Return to running:</p> <ul style="list-style-type: none"> <li>- &gt; 70% LSI</li> </ul> <p>Return to sport:</p> <ul style="list-style-type: none"> <li>- 90% LSI and &gt; normative value for age/gender/BW</li> </ul> <p><i>Return to sport score</i></p> <p>LSI &gt; 95% all three direction = 3 points</p> <p>&gt; Normative value for age/gender = 2 points</p> <p>Otherwise score 0</p> |
| <p><b>Gluteals - Single leg Bridge</b></p> <ul style="list-style-type: none"> <li>- Weight bearing leg: KF 60 degrees</li> <li>- Non weight bearing leg: full KE, thigh level with WB thigh</li> <li>- Arms crossed over chest</li> <li>- Elevate hips as high as possible</li> <li>- Assessor places hands at this height</li> <li>- Repeat as many times as possible touching assessors hands each time</li> <li>- Stop as soon as unable to bridge to original height</li> </ul>                                                                                                                                                                     | <p>Maximum number of reps</p> <p>Max at 40</p>                                                              | <p>Return to running:</p> <ul style="list-style-type: none"> <li>&gt; 95% LSI</li> <li>&gt; 15 reps</li> </ul>                                                                                                                                                                                                                                                                                  |

### Functional Testing

| Test Description                                                                                                                                                                                                                                                                                                                                                                                                                                                                 | Scoring                                                                                                                                                                                                                                                                        | Goal/Pass                                                            |
|----------------------------------------------------------------------------------------------------------------------------------------------------------------------------------------------------------------------------------------------------------------------------------------------------------------------------------------------------------------------------------------------------------------------------------------------------------------------------------|--------------------------------------------------------------------------------------------------------------------------------------------------------------------------------------------------------------------------------------------------------------------------------|----------------------------------------------------------------------|
| <p><b>One Leg Rise Test</b></p> <p>Patient sits on an adjustable plinth.</p> <p>Foot placed so heel is 10cm from edge of bed</p> <p>Plinth adjusted so knee is flexed to 90 degrees</p> <p>Arms crossed across chest</p> <p>Opposite leg suspended knee fully extended, hip at 30 degrees</p> <p>Rise on and off bed, allowing to just touch the surface with their bottom but are not allowed to completely sit or rest</p> <p>Completed at speed of 45bpm (MetroTimer App)</p> | <p>Number of reps completed</p> <p>Test stops if;</p> <ul style="list-style-type: none"> <li>- &gt; 3 loss of balance or other foot touching ground</li> <li>- Not keeping up with speed</li> <li>- Patient stops due to fatigue</li> <li>- Patient reaches 50 reps</li> </ul> | <p>Return to running: &gt;22</p> <p>Return to sport: &gt;95% LSI</p> |

| Test Description                                                                                                                                                                                                                                                                                                                                                                                                                                                                                                                                                                                                                                                                                                    | Scoring                                                                                                       | Goal                                                                                                        |
|---------------------------------------------------------------------------------------------------------------------------------------------------------------------------------------------------------------------------------------------------------------------------------------------------------------------------------------------------------------------------------------------------------------------------------------------------------------------------------------------------------------------------------------------------------------------------------------------------------------------------------------------------------------------------------------------------------------------|---------------------------------------------------------------------------------------------------------------|-------------------------------------------------------------------------------------------------------------|
| <p><b>Single Leg Hop For Distance</b></p> <ul style="list-style-type: none"> <li>- <i>Set up:</i> rigid tape with measuring tape (up to 150-200cm)</li> <li>- <i>Start position:</i> toes behind line, hand together behind back, NWB leg can do anything but touch the ground. WB leg – no limitations.</li> <li>- <i>Land position:</i> must “stick” landing. I.e. no secondary movements/hops. Must maintain balance and not touch NWB foot &gt; 3 secs/assessor confident balance has been controlled. NWB not allowed to touch other leg. hands must remain clasped behind back</li> <li>- <i>Record:</i> Continue on same leg until “plateau” i.e. no longer improving. Must record 3 good trials.</li> </ul> | <p>Maximum score (cm)</p> 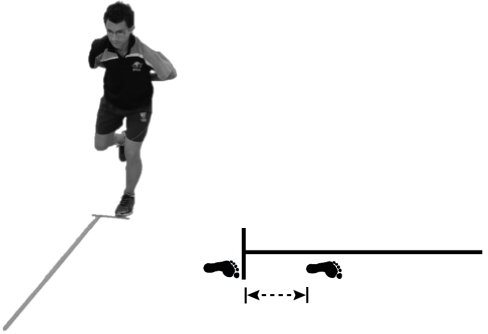 | <p>Return to running:<br/>NA</p> <p>Return to sport:<br/>&gt;95% LSI<br/>Normative value for age/gender</p> |

| Test Description                                                                                                                                                                                                                                                                                                                                                                                                                                                                                                                                                                                                                                                      | Scoring                                                                                                         | Goal                                                                                                        |
|-----------------------------------------------------------------------------------------------------------------------------------------------------------------------------------------------------------------------------------------------------------------------------------------------------------------------------------------------------------------------------------------------------------------------------------------------------------------------------------------------------------------------------------------------------------------------------------------------------------------------------------------------------------------------|-----------------------------------------------------------------------------------------------------------------|-------------------------------------------------------------------------------------------------------------|
| <p><b>Side Hop</b></p> <ul style="list-style-type: none"> <li>- <i>Set up:</i> rigid tape 30cm apart</li> <li>- <i>Start position:</i> toes behind line, hand together behind back, NWB leg can do anything but touch the ground. WB leg – no limitations.</li> <li>- <i>Land position:</i> must “stick” landing. I.e. no secondary movements/hops. Must maintain balance and not touch NWB foot &gt; 3 secs/assessor confident balance has been controlled. NWB not allowed to touch other leg. hands must remain clasped behind back</li> <li>- <i>Record:</i> Continue on same leg until “plateau” i.e. no longer improving. Must record 3 good trials.</li> </ul> | <p>Maximum reps in 30s</p> 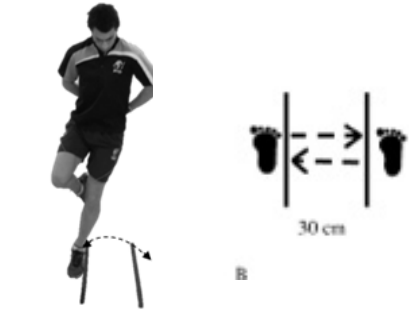 | <p>Return to running:<br/>NA</p> <p>Return to sport:<br/>&gt;95% LSI<br/>Normative value for age/gender</p> |
| <p><b>LESS Score</b></p> <p>- See Section 4.5 for how to score the quality of movement during double and single leg landings</p>                                                                                                                                                                                                                                                                                                                                                                                                                                                                                                                                      | <p>Record the LESS for right and left limb on a single leg hop</p>                                              | <p>0-3 points</p>                                                                                           |

| Test Description                                                                                                                                                                                                                                                                                                                                                                                                                                                                                                                                                                                                                                                                                                                    | Scoring                                                                                                       | Goal                                                                                                        |
|-------------------------------------------------------------------------------------------------------------------------------------------------------------------------------------------------------------------------------------------------------------------------------------------------------------------------------------------------------------------------------------------------------------------------------------------------------------------------------------------------------------------------------------------------------------------------------------------------------------------------------------------------------------------------------------------------------------------------------------|---------------------------------------------------------------------------------------------------------------|-------------------------------------------------------------------------------------------------------------|
| <p><b>Triple Crossover Hop</b></p> <ul style="list-style-type: none"> <li>- <i>Set up:</i> rigid tape x 2 with measuring tape (up to 600cm), 15cm apart</li> <li>- <i>Start position:</i> toes behind line, hand together behind back, NWB leg can do anything but touch the ground. WB leg – no limitations.</li> <li>- <i>Land position:</i> must “stick” landing. I.e. no secondary movements/hops. Must maintain balance and not touch NWB foot &gt; 3 secs/assessor confident balance has been controlled. NWB not allowed to touch other leg.</li> <li>- Hands must remain clasped behind back</li> <li>- <i>Record:</i> Continue on same leg until “plateau” i.e. no longer improving. Must record 3 good trials.</li> </ul> | <p>Maximum score (cm)</p> 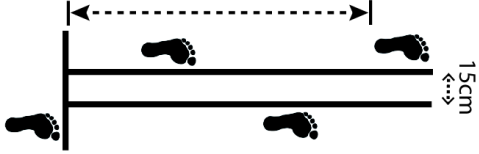 | <p>Return to running:<br/>NA</p> <p>Return to sport:<br/>&gt;95% LSI<br/>Normative value for age/gender</p> |
| <p><b>LESS Score</b></p> <ul style="list-style-type: none"> <li>- See Section 4.5 for how to score the quality of movement during agility cuts</li> </ul>                                                                                                                                                                                                                                                                                                                                                                                                                                                                                                                                                                           | <p>Record the LESS for right and left limb for a 90 degree cut</p>                                            | <p>0-3 points</p>                                                                                           |

# THANK YOU

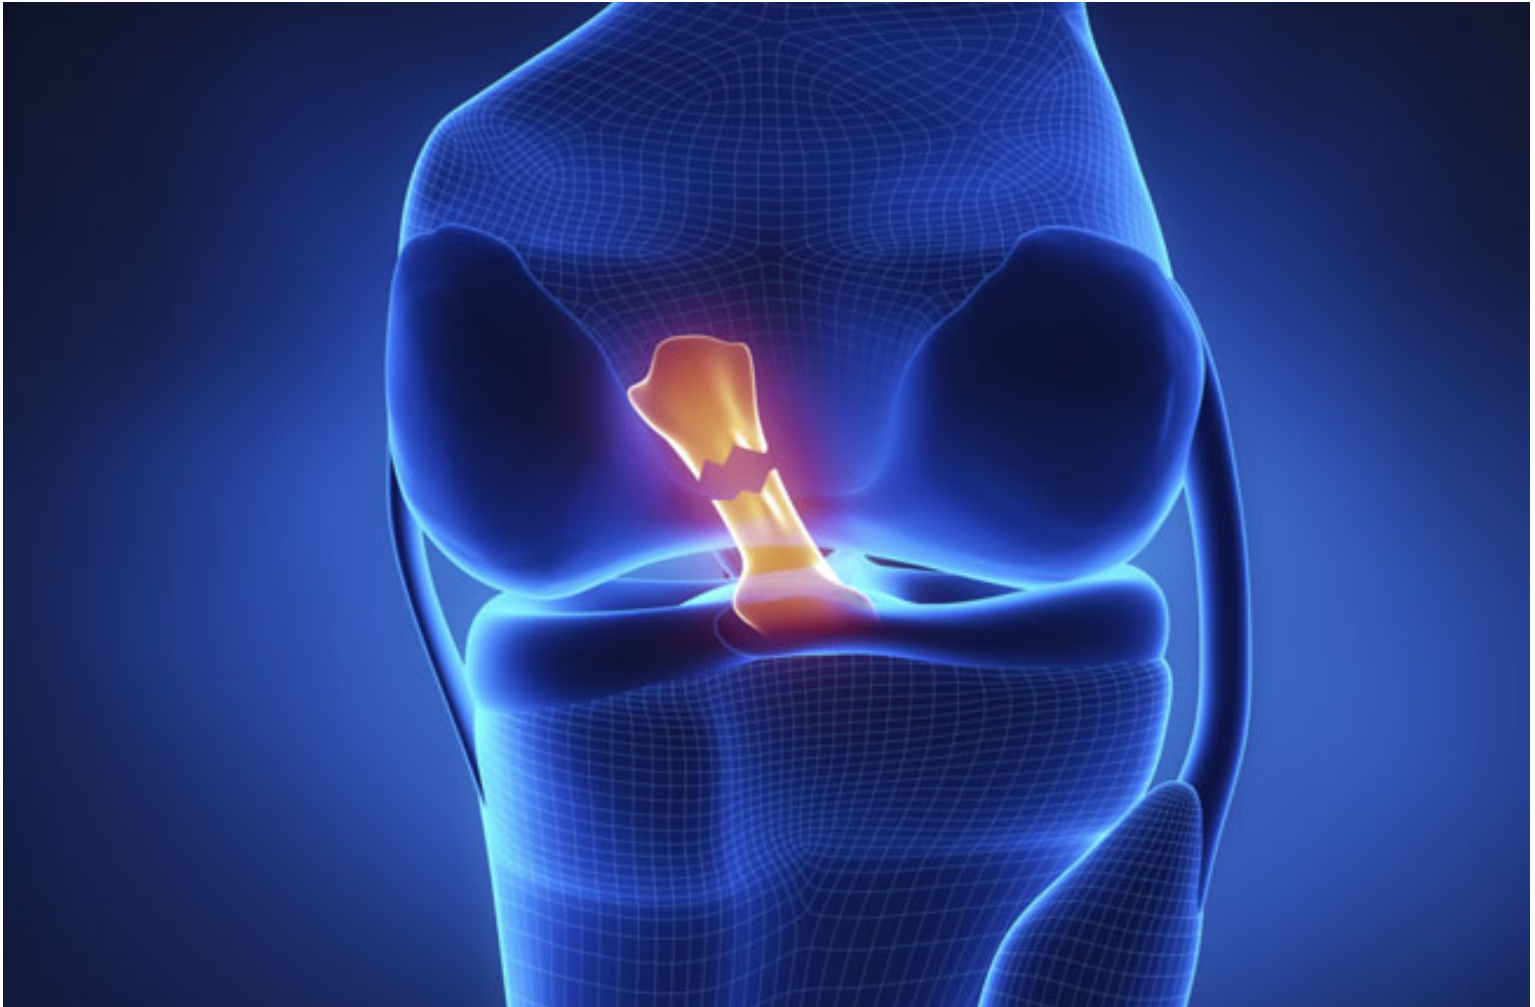

Investigators: Ms Brooke Patterson, Professor Kay Crossley, Dr Adam Culvenor, and Dr Christian Barton.

If you have any questions relating to the project please contact Chief Investigator – Professor Kay Crossley. This project is approved by the La Trobe Human Ethics Committee (HEC-16-077)

Please remember – investigator Brooke Patterson is blinded to patient group

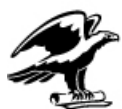

**LA TROBE**  
UNIVERSITY

Sport and Exercise Medicine  
Research Centre
