# Supplementary material for: Exercise-therapy and education for individuals one year after anterior cruciate ligament reconstruction: a pilot randomised controlled trial
Source: Springer Nature journal article supplement (doi:10.1186/s12891-020-03919-6), 2021-01-11
Supplement: MOESM5 [file 18758292]

## Additional File 5, Secondary outcomes additional detail

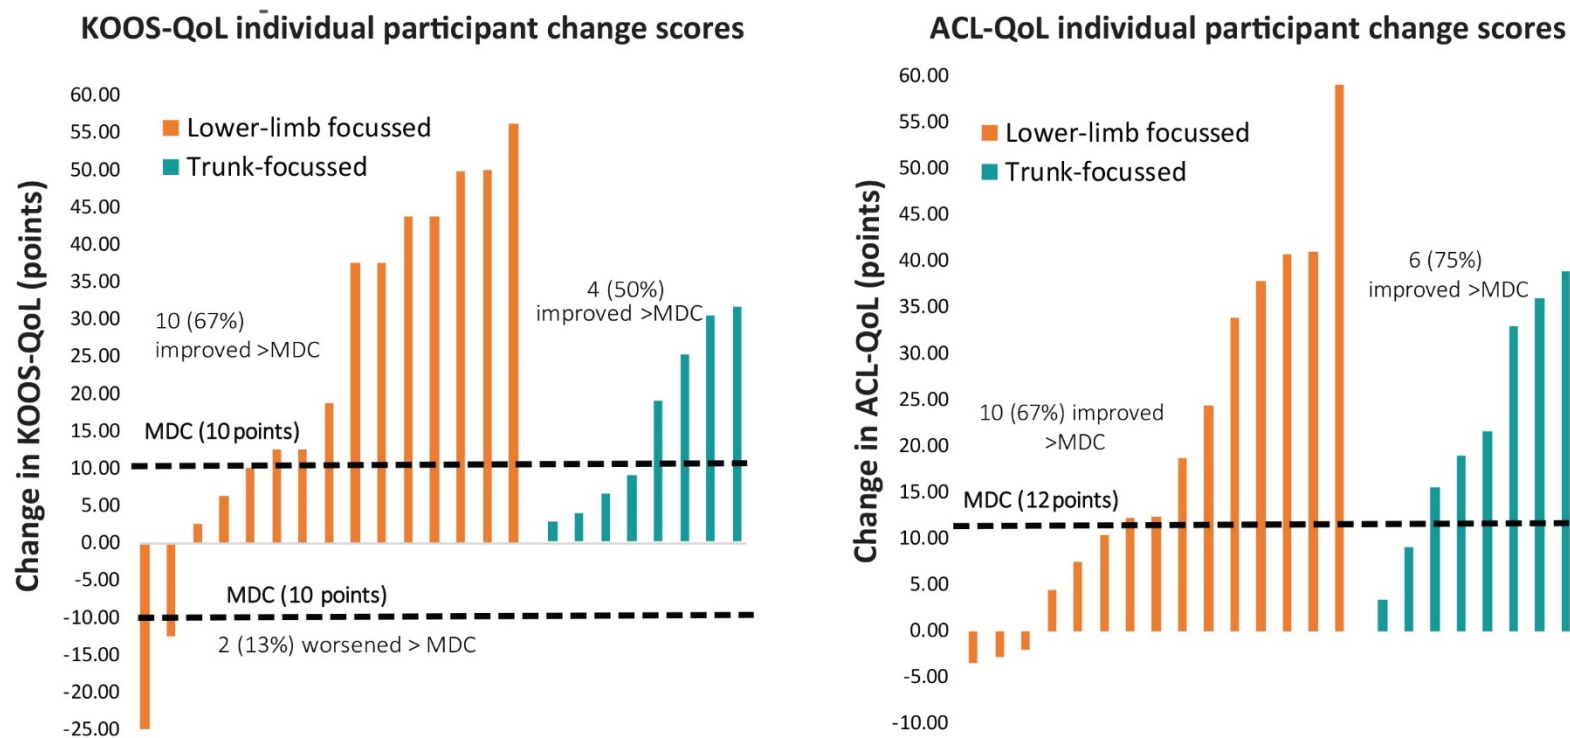

**Figure 1.** Individual participant changes for the KOOS-QoL and ACL-QoL

KOOS=Knee injury and Osteoarthritis Outcome Score; ACL-QoL=Anterior Cruciate Ligament Quality of Life survey; MDC=minimal detectable change for KOOS-QoL (10 points) and ACL-QoL (12 points).

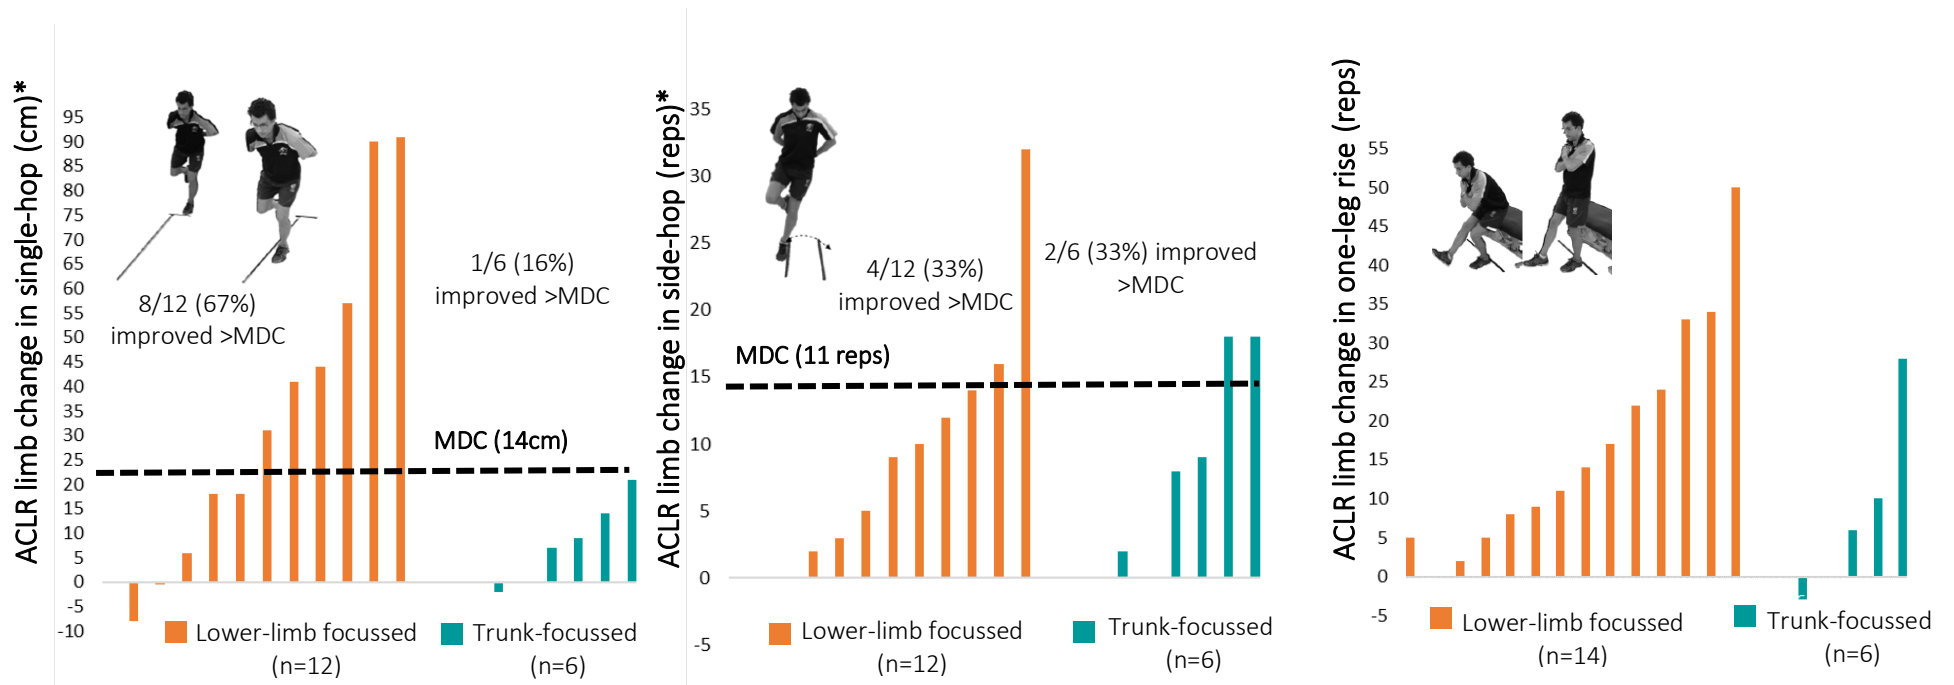

**Figure 2.** Individual participant changes for the functional performance in the ACLR limb

ACLR=anterior cruciate ligament reconstructed limb; MDC = minimal detectable change for the single-hop (14 cm) and side-hop (11 repetitions) from Kockum et al., (2015). No known MDC for the one-leg rise.

~n=20 out 23 completed follow-up functional performance assessment (n=2 overseas, n=1 work commitments).

\* single-hop and side-hop, n=18 (n=2 could not complete the hop-tests at follow-up as they were still recovering from adverse events; n=1 hamstring strain, n=1 ankle sprain).
